# Supplementary material
Source: publisher figshare collection journal article supplement (https://gsajournals.figshare.com/ndownloader/files/40289884)
Supplement: Supplementary file 1 [file 40289884]

## Sheet: common_genes_wormbase_format
[hpl-2 hyp]	[hpl-2int]	[hpl-1int]	[hpl-2hyp][hpl-1int]	[hpl-2int][hpl-1int]	[hpl-2hyp][hpl-2int][hpl-1int]	[hpl-2hyp][hpl-2int]
WBGene00013228	WBGene00013232	WBGene00001702	WBGene00013741	WBGene00006571	WBGene00014179	WBGene00001946
WBGene00013563	WBGene00013242	WBGene00017483	WBGene00018141	WBGene00013044	WBGene00000676	WBGene00013735
WBGene00013732	WBGene00013243	WBGene00020976	WBGene00021579	WBGene00007209	WBGene00019368	WBGene00012552
WBGene00012544	WBGene00013544	WBGene00017923	WBGene00013881	WBGene00004075	WBGene00022298	WBGene00012721
WBGene00003406	WBGene00013545	WBGene00044482	WBGene00000022	WBGene00000674	WBGene00019785	WBGene00012806
WBGene00012803	WBGene00013549	WBGene00017116	WBGene00005687	WBGene00021011	WBGene00022090	WBGene00011735
WBGene00011399	WBGene00013036	WBGene00016291	WBGene00018055	WBGene00000677	WBGene00001548	WBGene00011736
WBGene00009730	WBGene00013912	WBGene00006780	WBGene00015886	WBGene00044462	WBGene00003884	WBGene00021939
WBGene00006612	WBGene00006804	WBGene00019055	WBGene00020612	WBGene00019540	WBGene00018547	WBGene00019067
WBGene00010662	WBGene00001457	WBGene00000820	WBGene00017796	WBGene00019875	WBGene00018065	WBGene00016636
WBGene00021395	WBGene00012711	WBGene00015937	WBGene00012117	WBGene00021871	WBGene00013642	WBGene00022427
WBGene00022048	WBGene00000672	WBGene00000687	WBGene00000453	WBGene00022679	WBGene00013651	WBGene00019536
WBGene00000213	WBGene00012717	WBGene00016398	WBGene00007154	WBGene00016953	WBGene00020707	WBGene00022101
WBGene00021948	WBGene00012720	WBGene00006504	WBGene00013884	WBGene00016845	WBGene00020954	WBGene00022100
WBGene00021938	WBGene00011474	WBGene00001187	WBGene00010385	WBGene00008720	WBGene00018824	WBGene00044488
WBGene00019070	WBGene00011478	WBGene00018901	WBGene00219308	WBGene00008033	WBGene00017174	WBGene00002243
WBGene00021931	WBGene00000067	WBGene00018900	WBGene00013492	WBGene00010712	WBGene00022015	WBGene00021869
WBGene00009518	WBGene00012306	WBGene00019901	WBGene00044331	WBGene00044689	WBGene00001855	WBGene00021893
WBGene00021519	WBGene00019821	WBGene00016698	WBGene00009854	WBGene00017173	WBGene00015366	WBGene00019545
WBGene00021513	WBGene00000675	WBGene00003625	WBGene00009859	WBGene00000478	WBGene00011536	WBGene00017924
WBGene00021505	WBGene00002187	WBGene00044508	WBGene00013623	WBGene00020241	WBGene00000782	WBGene00010350
WBGene00021509	WBGene00022046	WBGene00015573	WBGene00006249	WBGene00018552	WBGene00012020	WBGene00014139
WBGene00006738	WBGene00019774	WBGene00019503	WBGene00005521	WBGene00017986	WBGene00013628	WBGene00044258
WBGene00022302	WBGene00015993	WBGene00006914	WBGene00009906	WBGene00001714	WBGene00009296	WBGene00000708
WBGene00044467	WBGene00004824	WBGene00006220	WBGene00009195	WBGene00003994	WBGene00008984	WBGene00001604
WBGene00016023	WBGene00021945	WBGene00016182	WBGene00045381	WBGene00000715	WBGene00012404	WBGene00013999
WBGene00019783	WBGene00000679	WBGene00002222	WBGene00005461	WBGene00003849	WBGene00013953	WBGene00044512
WBGene00022097	WBGene00000680	WBGene00012118	WBGene00044212	WBGene00009724	WBGene00013944	WBGene00022435
WBGene00022377	WBGene00016427	WBGene00045183	WBGene00005328	WBGene00008396	WBGene00005393	WBGene00001564
WBGene00006705	WBGene00000681	WBGene00000594	WBGene00009297	WBGene00013878	WBGene00013481	WBGene00022285
WBGene00050885	WBGene00003794	WBGene00001653	WBGene00009836	WBGene00044193	WBGene00045364	WBGene00004139
WBGene00021877	WBGene00019537	WBGene00004228	WBGene00012492	WBGene00011948	WBGene00010107	WBGene00018115
WBGene00044489	WBGene00021507	WBGene00011182	WBGene00005349	WBGene00006375	WBGene00012836	WBGene00006589
WBGene00044490	WBGene00000682	WBGene00009035	WBGene00005330	WBGene00006585	WBGene00012253	WBGene00044521
WBGene00021881	WBGene00000683	WBGene00006406	WBGene00008017	WBGene00009196	WBGene00001691	WBGene00020962
WBGene00021892	WBGene00022300	WBGene00011727	WBGene00006692	WBGene00009572	WBGene00012186	WBGene00018060
WBGene00003889	WBGene00022134	WBGene00010918	WBGene00005493	WBGene00012304	WBGene00019146	WBGene00018061
WBGene00022608	WBGene00021430	WBGene00009547	WBGene00005507	WBGene00050893	WBGene00000185	WBGene00006164
WBGene00021370	WBGene00022078	WBGene00002827	WBGene00012570	WBGene00001080	WBGene00010331	WBGene00021080
WBGene00021586	WBGene00022382	WBGene00010666	WBGene00007565	WBGene00012574	WBGene00022517	WBGene00044541
WBGene00018645	WBGene00021870	WBGene00007732	WBGene00008899	WBGene00005419	WBGene00022390	WBGene00000244
WBGene00001033	WBGene00022069	WBGene00010435	WBGene00011212	WBGene00013950	WBGene00022385	WBGene00007082
WBGene00019721	WBGene00022070	WBGene00004424	WBGene00012575	WBGene00013954	WBGene00018786	WBGene00009299
WBGene00043067	WBGene00022064	WBGene00004333	WBGene00194680	WBGene00077655	WBGene00021690	WBGene00001397
WBGene00015049	WBGene00022060	WBGene00012191	WBGene00013971	WBGene00012452	WBGene00185098	WBGene00011254
WBGene00000692	WBGene00021087	WBGene00012090	WBGene00195058	WBGene00008070	WBGene00044435	WBGene00004003
WBGene00009075	WBGene00001999	WBGene00023520	WBGene00013586	WBGene00077688	WBGene00021471	WBGene00008441
WBGene00001476	WBGene00018330	WBGene00012159	WBGene00012689	WBGene00013824	WBGene00002179	WBGene00013343
WBGene00001328	WBGene00001692	WBGene00235300	WBGene00012818	WBGene00013830	WBGene00005517	WBGene00013487
WBGene00007446	WBGene00006769	WBGene00011371	WBGene00008946	WBGene00001700	WBGene00009753	WBGene00013583
WBGene00010351	WBGene00006383	WBGene00018010	WBGene00013832	WBGene00006321	WBGene00219319	WBGene00007583
WBGene00010352	WBGene00021381	WBGene00021451	WBGene00013771	WBGene00002983	WBGene00001131	WBGene00012808
WBGene00010354	WBGene00000481	WBGene00019452	WBGene00009762	WBGene00000083	WBGene00008853	WBGene00012809
WBGene00007778	WBGene00003129	WBGene00022756	WBGene00001237	WBGene00007934	WBGene00012102	WBGene00012815
WBGene00009889	WBGene00021358	WBGene00005896	WBGene00018607	WBGene00001251	WBGene00014201	WBGene00007177
WBGene00006766	WBGene00021365	WBGene00006268	WBGene00004335	WBGene00009787	WBGene00006616	WBGene00013765
WBGene00194915	WBGene00021371	WBGene00016686	WBGene00018227	WBGene00019574	WBGene00008188	WBGene00005147
WBGene00013375	WBGene00021369	WBGene00005634	WBGene00018283	WBGene00003891	WBGene00006824	WBGene00007126
WBGene00012867	WBGene00006970	WBGene00018056	WBGene00007750	WBGene00021027	WBGene00009306	WBGene00022203
WBGene00003086	WBGene00018145	WBGene00005423	WBGene00020794	WBGene00302974	WBGene00006789	WBGene00020494
WBGene00013304	WBGene00021581	WBGene00019179	WBGene00000294	WBGene00022388	WBGene00001488	WBGene00018938
WBGene00194649	WBGene00003955	WBGene00018539	WBGene00018310	WBGene00022155	WBGene00004237	WBGene00219451
WBGene00013315	WBGene00019531	WBGene00019470	WBGene00022278	WBGene00022161	WBGene00013969	WBGene00018589
WBGene00005101	WBGene00019530	WBGene00005623	WBGene00001773	WBGene00022143	WBGene00021986	WBGene00020767
WBGene00013632	WBGene00000611	WBGene00021555	WBGene00022112	WBGene00004014	WBGene00018783	WBGene00019735
WBGene00013658	WBGene00000123	WBGene00019235	WBGene00017909	WBGene00019461	WBGene00019343	WBGene00015293
WBGene00013418	WBGene00000610	WBGene00017262	WBGene00003516	WBGene00000625	WBGene00017255	WBGene00006408
WBGene00013100	WBGene00017482	WBGene00017772	WBGene00016565	WBGene00021039	WBGene00022712	WBGene00006588
WBGene00004403	WBGene00020977	WBGene00000980	WBGene00022634	WBGene00021035	WBGene00019511	WBGene00006587
WBGene00013805	WBGene00022680	WBGene00021068	WBGene00007911	WBGene00008878	WBGene00021296	WBGene00022315
WBGene00007820	WBGene00000685	WBGene00018488	WBGene00206530	WBGene00013932	WBGene00017179	WBGene00000754
WBGene00006419	WBGene00020679	WBGene00044545	WBGene00004509	WBGene00008293	WBGene00021117	WBGene00003514
WBGene00015258	WBGene00006053	WBGene00022845	WBGene00010168	WBGene00010769	WBGene00021171	WBGene00008622
WBGene00015255	WBGene00004374	WBGene00019655	WBGene00012500	WBGene00009361	WBGene00013266	WBGene00002280
WBGene00005258	WBGene00020435	WBGene00020528	WBGene00020205	WBGene00012036	WBGene00012288	WBGene00003370
WBGene00003696	WBGene00004804	WBGene00006801	WBGene00019700	WBGene00013403	WBGene00012332	WBGene00020732
WBGene00001480	WBGene00019153	WBGene00005925	WBGene00018442	WBGene00014102	WBGene00000662	WBGene00022275
WBGene00235315	WBGene00000256	WBGene00017316	WBGene00269388	WBGene00013672	WBGene00013221	WBGene00016906
WBGene00019977	WBGene00006052	WBGene00015464	WBGene00269389	WBGene00017208	WBGene00021043	WBGene00020090
WBGene00016513	WBGene00000551	WBGene00005108	WBGene00015827	WBGene00019335	WBGene00017937	WBGene00021028
WBGene00021602	WBGene00000603	WBGene00016505	WBGene00022690	WBGene00001546	WBGene00020116	WBGene00022037
WBGene00021492	WBGene00004471	WBGene00044553	WBGene00206415	WBGene00020233	WBGene00020117	WBGene00020281
WBGene00000056	WBGene00006930	WBGene00018293	WBGene00017213	WBGene00004210	WBGene00021853	WBGene00022386
WBGene00206511	WBGene00019510	WBGene00018294	WBGene00016337	WBGene00019513	WBGene00019997	WBGene00022391
WBGene00016050	WBGene00016178	WBGene00015220	WBGene00019591	WBGene00015200	WBGene00021808	WBGene00044896
WBGene00016859	WBGene00000693	WBGene00003386	WBGene00016574	WBGene00020408	WBGene00013448	WBGene00003111
WBGene00020877	WBGene00011456	WBGene00016094	WBGene00005543	WBGene00001541	WBGene00012761	WBGene00006771
WBGene00020883	WBGene00000696	WBGene00000717	WBGene00015134	WBGene00020290		WBGene00044347
WBGene00015879	WBGene00000697	WBGene00044582	WBGene00019410	WBGene00015841		WBGene00021763
WBGene00015435	WBGene00000698	WBGene00017194	WBGene00016890	WBGene00021116		WBGene00021239
WBGene00020620	WBGene00011597	WBGene00000766	WBGene00011579	WBGene00021142		WBGene00021346
WBGene00021079	WBGene00011259	WBGene00008233	WBGene00001133	WBGene00011304		WBGene00021469
WBGene00021078	WBGene00007448	WBGene00006470	WBGene00022344	WBGene00010989		WBGene00077563
WBGene00021559	WBGene00009038	WBGene00009584	WBGene00021900	WBGene00011522		WBGene00021473
WBGene00019274	WBGene00003148	WBGene00005618	WBGene00015580	WBGene00012586		WBGene00017736
WBGene00003574	WBGene00004755	WBGene00007073	WBGene00000542	WBGene00012595		WBGene00016950
WBGene00019649	WBGene00010920	WBGene00012530	WBGene00044903	WBGene00013011		WBGene00004226
WBGene00000862	WBGene00000703	WBGene00011891	WBGene00006784	WBGene00006787		WBGene00000832
WBGene00015450	WBGene00009955	WBGene00011895	WBGene00219421	WBGene00013157		WBGene00021271
WBGene00004795	WBGene00007987	WBGene00013863		WBGene00018246		WBGene00023172
WBGene00017468	WBGene00003150	WBGene00009241		WBGene00004045		WBGene00018232
WBGene00004099	WBGene00000705	WBGene00009331		WBGene00020550		WBGene00022126
WBGene00000029	WBGene00000706	WBGene00000726		WBGene00019328		WBGene00045399
WBGene00000031	WBGene00000417	WBGene00010741		WBGene00015268		WBGene00016561
WBGene00021732	WBGene00004156	WBGene00001645		WBGene00002915		WBGene00000254
WBGene00015076	WBGene00013379	WBGene00008335		WBGene00020104		WBGene00006754
WBGene00015074	WBGene00007195	WBGene00008333		WBGene00000666		WBGene00009188
WBGene00015073	WBGene00000707	WBGene00000146		WBGene00004980		WBGene00003777
WBGene00018424	WBGene00013290	WBGene00010079		WBGene00010974		WBGene00013125
WBGene00015424	WBGene00012768	WBGene00004855		WBGene00003589		WBGene00013181
WBGene00015677	WBGene00012769	WBGene00003886		WBGene00008422		WBGene00010654
WBGene00020270	WBGene00010415	WBGene00008646		WBGene00013445		WBGene00008854
WBGene00004740	WBGene00000710	WBGene00014123		WBGene00194733		WBGene00001045
WBGene00018698	WBGene00012791	WBGene00014098				WBGene00007603
WBGene00017195	WBGene00013776	WBGene00011014				WBGene00012106
WBGene00010593	WBGene00219547	WBGene00008101				WBGene00012107
WBGene00011003	WBGene00013790	WBGene00011590				WBGene00004181
WBGene00008254	WBGene00006698	WBGene00011305				WBGene00012209
WBGene00001178	WBGene00002005	WBGene00011648				WBGene00012480
WBGene00044286	WBGene00003525	WBGene00045488				WBGene00009064
WBGene00001747	WBGene00021003	WBGene00010868				WBGene00011434
WBGene00004910	WBGene00019814	WBGene00010426				WBGene00012238
WBGene00003536	WBGene00020706	WBGene00010283				WBGene00013502
WBGene00011712	WBGene00021450	WBGene00008629				WBGene00009865
WBGene00008339	WBGene00019743	WBGene00219324				WBGene00002978
WBGene00009532	WBGene00003648	WBGene00013024				WBGene00020171
WBGene00011270	WBGene00005898	WBGene00008269				WBGene00000106
WBGene00011587	WBGene00005643	WBGene00011251				WBGene00020231
WBGene00011306	WBGene00020062	WBGene00008183				WBGene00044367
WBGene00007929	WBGene00019563	WBGene00004336				WBGene00003709
WBGene00044082	WBGene00021748	WBGene00010380				WBGene00022452
WBGene00013876	WBGene00019626	WBGene00004747				WBGene00022714
WBGene00009081	WBGene00022286	WBGene00006147				WBGene00016576
WBGene00001519	WBGene00020017	WBGene00006093				WBGene00020407
WBGene00011318	WBGene00021605	WBGene00012045				WBGene00017451
WBGene00005278	WBGene00021601	WBGene00009485				WBGene00017557
WBGene00009978	WBGene00044344	WBGene00009226				WBGene00000647
WBGene00006103	WBGene00020391	WBGene00007833				WBGene00017947
WBGene00006077	WBGene00021304	WBGene00194715				WBGene00015116
WBGene00011754	WBGene00021302	WBGene00013607				WBGene00001948
WBGene00012346	WBGene00018099	WBGene00009855				WBGene00011755
WBGene00005745	WBGene00018097	WBGene00005145				WBGene00002265
WBGene00012309	WBGene00016697	WBGene00013622				WBGene00012219
WBGene00012025	WBGene00021168	WBGene00013941				WBGene00012457
WBGene00012021	WBGene00018761	WBGene00013469				WBGene00016825
WBGene00005425	WBGene00018758	WBGene00005414				WBGene00012285
WBGene00004026	WBGene00302982	WBGene00008010				WBGene00012905
WBGene00013608	WBGene00003579	WBGene00006688				WBGene00012920
WBGene00009860	WBGene00021562	WBGene00008892				WBGene00009390
WBGene00005770	WBGene00005919	WBGene00011211				WBGene00010269
WBGene00003706	WBGene00004130	WBGene00013483				WBGene00002264
WBGene00005578	WBGene00002246	WBGene00008066				WBGene00012993
WBGene00011486	WBGene00020696	WBGene00005832				WBGene00008448
WBGene00013938	WBGene00020700	WBGene00012250				WBGene00013096
WBGene00013940	WBGene00003025	WBGene00044655				WBGene00012333
WBGene00013943	WBGene00021482	WBGene00013834				WBGene00010720
WBGene00009571	WBGene00000498	WBGene00005392				WBGene00012979
WBGene00005321	WBGene00019970	WBGene00009760				WBGene00000208
WBGene00011841	WBGene00020239	WBGene00012185				WBGene00013166
WBGene00050934	WBGene00021627	WBGene00000484				WBGene00007064
WBGene00013472	WBGene00006796	WBGene00015138				WBGene00016221
WBGene00013470	WBGene00000712	WBGene00017896				WBGene00006894
WBGene00044654	WBGene00022584	WBGene00003408				WBGene00001561
WBGene00044202	WBGene00000030	WBGene00017780				WBGene00016030
WBGene00009835	WBGene00015371	WBGene00019435				WBGene00015266
WBGene00012491	WBGene00000455	WBGene00019188				WBGene00022488
WBGene00012081	WBGene00019600	WBGene00016485				WBGene00021261
WBGene00008016	WBGene00018427	WBGene00022508				WBGene00021592
WBGene00008012	WBGene00000893	WBGene00001569				WBGene00021439
WBGene00194801	WBGene00000713	WBGene00044621				WBGene00016524
WBGene00010300	WBGene00017834	WBGene00018738				WBGene00022175
WBGene00007570	WBGene00020948	WBGene00001551				WBGene00004976
WBGene00008893	WBGene00000714	WBGene00018715				WBGene00015386
WBGene00007182	WBGene00020245	WBGene00018744				WBGene00010838
WBGene00194695	WBGene00003242	WBGene00015172				WBGene00010839
WBGene00005829	WBGene00018292	WBGene00000175				WBGene00010362
WBGene00013077	WBGene00000718	WBGene00006948				WBGene00012863
WBGene00006714	WBGene00016045	WBGene00015790				WBGene00004736
WBGene00012455	WBGene00011573	WBGene00001400				WBGene00012271
WBGene00013972	WBGene00006777	WBGene00006952				WBGene00012972
WBGene00008700	WBGene00000722	WBGene00020845				WBGene00012356
WBGene00012688	WBGene00000724	WBGene00015354				WBGene00012933
WBGene00012684	WBGene00000602	WBGene00020567				WBGene00012125
WBGene00003685	WBGene00000601	WBGene00022499				WBGene00001077
WBGene00003669	WBGene00009058	WBGene00021319				WBGene00004960
WBGene00012067	WBGene00011715	WBGene00020672				WBGene00013424
WBGene00219452	WBGene00004032	WBGene00018514
WBGene00009018	WBGene00000614	WBGene00006424
WBGene00044197	WBGene00003515	WBGene00015625
WBGene00008068	WBGene00005018	WBGene00000741
WBGene00007723	WBGene00001137	WBGene00020506
WBGene00012838	WBGene00000732	WBGene00016976
WBGene00012246	WBGene00000733	WBGene00006746
WBGene00012251	WBGene00044109	WBGene00015865
WBGene00013828	WBGene00044194	WBGene00020335
WBGene00005389	WBGene00003834	WBGene00018485
WBGene00013750	WBGene00011132	WBGene00019148
WBGene00013758	WBGene00009221	WBGene00017569
WBGene00009166	WBGene00011942	WBGene00011643
WBGene00001248	WBGene00011688	WBGene00003553
WBGene00001547	WBGene00009031	WBGene00011462
WBGene00022213	WBGene00008724	WBGene00010224
WBGene00004011	WBGene00012315	WBGene00007944
WBGene00022504	WBGene00045382	WBGene00007957
WBGene00016487	WBGene00009834	WBGene00219301
WBGene00044701	WBGene00007675	WBGene00000277
WBGene00020135	WBGene00012405	WBGene00012303
WBGene00019321	WBGene00010296	WBGene00004008
WBGene00016559	WBGene00006150	WBGene00008901
WBGene00001803	WBGene00005500	WBGene00004108
WBGene00018258	WBGene00007853	WBGene00007848
WBGene00003732	WBGene00005397	WBGene00012445
WBGene00000283	WBGene00013489	WBGene00001451
WBGene00015564	WBGene00013973	WBGene00013496
WBGene00016531	WBGene00009016	WBGene00007664
WBGene00001000	WBGene00009021	WBGene00010434
WBGene00019987	WBGene00012825	WBGene00001148
WBGene00006764	WBGene00003959	WBGene00007260
WBGene00006881	WBGene00006786	WBGene00007486
WBGene00008952	WBGene00007017	WBGene00007523
WBGene00000217	WBGene00000736	WBGene00017340
WBGene00010492	WBGene00015430	WBGene00000253
WBGene00007849	WBGene00004377	WBGene00020091
WBGene00007904	WBGene00017298	WBGene00022032
WBGene00007751	WBGene00019436	WBGene00044434
WBGene00009303	WBGene00006955	WBGene00020283
WBGene00010702	WBGene00000737	WBGene00021692
WBGene00004776	WBGene00001065	WBGene00021007
WBGene00015673	WBGene00003968	WBGene00003156
WBGene00304806	WBGene00020511	WBGene00001232
WBGene00016269	WBGene00044901	WBGene00003422
WBGene00015868	WBGene00004951	WBGene00000284
WBGene00018771	WBGene00000033	WBGene00017026
WBGene00016903	WBGene00018024	WBGene00044423
WBGene00016902	WBGene00003907	WBGene00001430
WBGene00235388	WBGene00000738	WBGene00003072
WBGene00002040	WBGene00018877	WBGene00003029
WBGene00022519	WBGene00000066	WBGene00016605
WBGene00236808	WBGene00022501	WBGene00021628
WBGene00021335	WBGene00006926	WBGene00006058
WBGene00004952	WBGene00044299	WBGene00016733
WBGene00022838	WBGene00001070	WBGene00001833
WBGene00022837	WBGene00002125	WBGene00016327
WBGene00000165	WBGene00000739	WBGene00015096
WBGene00021685	WBGene00000742	WBGene00004965
WBGene00001707	WBGene00000744	WBGene00185086
WBGene00019674	WBGene00003495	WBGene00018895
WBGene00004969	WBGene00020884	WBGene00020419
WBGene00018580	WBGene00000746	WBGene00002258
WBGene00018579	WBGene00015168	WBGene00016494
WBGene00001115	WBGene00044068	WBGene00020659
WBGene00006461	WBGene00004949	WBGene00006423
WBGene00017398	WBGene00006925	WBGene00011061
WBGene00017741	WBGene00017714	WBGene00011063
WBGene00022281	WBGene00001854	WBGene00007742
WBGene00000788	WBGene00017401	WBGene00000156
WBGene00022129	WBGene00011763	WBGene00003136
WBGene00022131	WBGene00013871	WBGene00008890
WBGene00022110	WBGene00000749	WBGene00008531
WBGene00004049	WBGene00000018	WBGene00219283
WBGene00022108	WBGene00011880	WBGene00009343
WBGene00003387	WBGene00001690	WBGene00009479
WBGene00021835	WBGene00001981	WBGene00007278
WBGene00020914	WBGene00000753	WBGene00002142
WBGene00021038	WBGene00010067	WBGene00014965
WBGene00017650	WBGene00044149	WBGene00010324
WBGene00016839	WBGene00003623	WBGene00009116
WBGene00000779	WBGene00010690	WBGene00016458
WBGene00006820	WBGene00000756	WBGene00044250
WBGene00019769	WBGene00006517	WBGene00008783
WBGene00006797	WBGene00001898	WBGene00009607
WBGene00006508	WBGene00006634	WBGene00010170
WBGene00006819	WBGene00007350	WBGene00011657
WBGene00001598	WBGene00008976	WBGene00008472
WBGene00007977	WBGene00001096	WBGene00010768
WBGene00010731	WBGene00000618	WBGene00003578
WBGene00016461	WBGene00011683	WBGene00012477
WBGene00077519	WBGene00007877	WBGene00004063
WBGene00013179	WBGene00007878	WBGene00012505
WBGene00000410	WBGene00004123	WBGene00008909
WBGene00000010	WBGene00007484	WBGene00014235
WBGene00007766	WBGene00020770	WBGene00014196
WBGene00010651	WBGene00000281	WBGene00009695
WBGene00000641	WBGene00045272	WBGene00010808
WBGene00010653	WBGene00015676	WBGene00011433
WBGene00009315	WBGene00006067	WBGene00014101
WBGene00008858	WBGene00003600	WBGene00001147
WBGene00002232	WBGene00018192	WBGene00009304
WBGene00206532	WBGene00022276	WBGene00020835
WBGene00009416	WBGene00021681	WBGene00021101
WBGene00012961	WBGene00000622	WBGene00021092
WBGene00010821	WBGene00003229	WBGene00021576
WBGene00009616	WBGene00002079	WBGene00019313
WBGene00011781	WBGene00020088	WBGene00018575
WBGene00008476	WBGene00006385	WBGene00018816
WBGene00003098	WBGene00022040	WBGene00015595
WBGene00006829	WBGene00001725	WBGene00194714
WBGene00012214	WBGene00022029	WBGene00019036
WBGene00077769	WBGene00022026	WBGene00019042
WBGene00009359	WBGene00021208	WBGene00018439
WBGene00009363	WBGene00000624	WBGene00018437
WBGene00011586	WBGene00021213	WBGene00305113
WBGene00012478	WBGene00022389	WBGene00015609
WBGene00009061	WBGene00021333	WBGene00016882
WBGene00006048	WBGene00021328	WBGene00022685
WBGene00007214	WBGene00001745	WBGene00016547
WBGene00007213	WBGene00004429	WBGene00019586
WBGene00012289	WBGene00271777	WBGene00271744
WBGene00013599	WBGene00021693	WBGene00235164
WBGene00012391	WBGene00022274	WBGene00017527
WBGene00012576	WBGene00022148	WBGene00018019
WBGene00012365	WBGene00022139	WBGene00020229
WBGene00045058	WBGene00022140	WBGene00019687
WBGene00007991	WBGene00021472	WBGene00022442
WBGene00004202	WBGene00021474	WBGene00305132
WBGene00014103	WBGene00021460	WBGene00021298
WBGene00008187	WBGene00017735	WBGene00017452
WBGene00010578	WBGene00006047	WBGene00305091
WBGene00013666	WBGene00021270	WBGene00019795
WBGene00013668	WBGene00017978	WBGene00019794
WBGene00013692	WBGene00004946	WBGene00020777
WBGene00020837	WBGene00022133	WBGene00018810
WBGene00018507	WBGene00021128	WBGene00016778
WBGene00017875	WBGene00021837	WBGene00017944
WBGene00017873	WBGene00004775	WBGene00018044
WBGene00016308	WBGene00021639	WBGene00018269
WBGene00019699	WBGene00000368	WBGene00016355
WBGene00006195	WBGene00004272	WBGene00019895
WBGene00019306	WBGene00004147	WBGene00019086
WBGene00003545	WBGene00021630	WBGene00017291
WBGene00018734	WBGene00020131	WBGene00000935
WBGene00023410	WBGene00021113	WBGene00002053
WBGene00021968	WBGene00019771	WBGene00018873
WBGene00018819	WBGene00017885	WBGene00001208
WBGene00018815	WBGene00003934	WBGene00016315
WBGene00019209	WBGene00001599	WBGene00019426
WBGene00019207	WBGene00020936	WBGene00003621
WBGene00019415	WBGene00003622	WBGene00019905
WBGene00020327	WBGene00002348	WBGene00015795
WBGene00020329	WBGene00011376	WBGene00001872
WBGene00015599	WBGene00009457	WBGene00016277
WBGene00019037	WBGene00002226	WBGene00018394
WBGene00019035	WBGene00010612	WBGene00017023
WBGene00018436	WBGene00013894	WBGene00022887
WBGene00018105	WBGene00009113	WBGene00006947
WBGene00018102	WBGene00015024	WBGene00006363
WBGene00020361	WBGene00018847	WBGene00003044
WBGene00015830	WBGene00013127	WBGene00008435
WBGene00018667	WBGene00004706	WBGene00010503
WBGene00020533	WBGene00013180	WBGene00003241
WBGene00044360	WBGene00010157	WBGene00004264
WBGene00016341	WBGene00007768	WBGene00000894
WBGene00016342	WBGene00009314	WBGene00009901
WBGene00019592	WBGene00000415	WBGene00195147
WBGene00019593	WBGene00013135	WBGene00008803
WBGene00305114	WBGene00013138	WBGene00011888
WBGene00017525	WBGene00305049	WBGene00007690
WBGene00004129	WBGene00010246	WBGene00001527
WBGene00018769	WBGene00009611	WBGene00011980
WBGene00005574	WBGene00011658	WBGene00007374
WBGene00005573	WBGene00012105	WBGene00008458
WBGene00017918	WBGene00001008	WBGene00014246
WBGene00017911	WBGene00010419	WBGene00014171
WBGene00022716	WBGene00012193	WBGene00000655
WBGene00015197	WBGene00003948	WBGene00002297
WBGene00015199	WBGene00010806	WBGene00009354
WBGene00005542	WBGene00012343	WBGene00011530
WBGene00002102	WBGene00012387	WBGene00007342
WBGene00017181	WBGene00012578	WBGene00007149
WBGene00018198	WBGene00009824	WBGene00010056
WBGene00021589	WBGene00006565	WBGene00008545
WBGene00015856	WBGene00007988	WBGene00012149
WBGene00021721	WBGene00008610	WBGene00009657
WBGene00017406	WBGene00005078	WBGene00012085
WBGene00044811	WBGene00000034	WBGene00000528
WBGene00271824	WBGene00016075	WBGene00013255
WBGene00006495	WBGene00019498	WBGene00013273
WBGene00017948	WBGene00018496	WBGene00012585
WBGene00206414	WBGene00235351	WBGene00012592
WBGene00021057	WBGene00000617	WBGene00045289
WBGene00018048	WBGene00004076	WBGene00012199
WBGene00004737	WBGene00020326	WBGene00000037
WBGene00022874	WBGene00020328	WBGene00011050
WBGene00004346	WBGene00022553	WBGene00011049
WBGene00020479	WBGene00003734	WBGene00010194
WBGene00001597	WBGene00018433	WBGene00018243
WBGene00004244	WBGene00006882	WBGene00018248
WBGene00018397	WBGene00017055	WBGene00003936
WBGene00023408	WBGene00022443	WBGene00018363
WBGene00011468	WBGene00020430	WBGene00000895
WBGene00007688	WBGene00016575	WBGene00017758
WBGene00004174	WBGene00005540	WBGene00022322
WBGene00007334	WBGene00005544	WBGene00021256
WBGene00006853	WBGene00005590	WBGene00010451
WBGene00008137	WBGene00015909	WBGene00009502
WBGene00003979	WBGene00018196	WBGene00007138
WBGene00010787	WBGene00021730	WBGene00303105
WBGene00012220	WBGene00015848	WBGene00000396
WBGene00012462	WBGene00303369	WBGene00022598
WBGene00006601	WBGene00019793	WBGene00002048
WBGene00013247	WBGene00017587	WBGene00016199
WBGene00016826	WBGene00017584	WBGene00015481
WBGene00008838	WBGene00016709	WBGene00015637
WBGene00011878	WBGene00020771	WBGene00017950
WBGene00012894	WBGene00022739	WBGene00000872
WBGene00012914	WBGene00001976	WBGene00020107
WBGene00008929	WBGene00003424	WBGene00018951
WBGene00012987	WBGene00000606	WBGene00003497
WBGene00012997	WBGene00000609	WBGene00022816
WBGene00010069	WBGene00000649	WBGene00045247
WBGene00013208	WBGene00001101	WBGene00015557
WBGene00011052	WBGene00003456	WBGene00019677
WBGene00008578	WBGene00003469	WBGene00000939
WBGene00044074	WBGene00004702	WBGene00016799
WBGene00010721	WBGene00019273	WBGene00016242
WBGene00012227	WBGene00015796	WBGene00003562
WBGene00010193	WBGene00016173	WBGene00015523
WBGene00013190	WBGene00011638	WBGene00022718
WBGene00021597	WBGene00009042	WBGene00003001
WBGene00016226	WBGene00000616	WBGene00007401
WBGene00020541	WBGene00000251	WBGene00003482
WBGene00020546	WBGene00000657	WBGene00013499
WBGene00002230	WBGene00004300	WBGene00009654
WBGene00020457	WBGene00000472	WBGene00001996
WBGene00019915	WBGene00000851	WBGene00012272
WBGene00022353	WBGene00006414	WBGene00000669
WBGene00005141	WBGene00005016	WBGene00006683
WBGene00005143	WBGene00004698	WBGene00013431
WBGene00019709	WBGene00010053	WBGene00044233
WBGene00021433	WBGene00013926	WBGene00006762
WBGene00021700	WBGene00012148	WBGene00010072
WBGene00021866	WBGene00008743	WBGene00013578
WBGene00021022	WBGene00002262	WBGene00011475
WBGene00017103	WBGene00000114	WBGene00011729
WBGene00021850	WBGene00012395	WBGene00007065
WBGene00003941	WBGene00012222	WBGene00016638
WBGene00022177	WBGene00003228	WBGene00000546
WBGene00022181	WBGene00000565	WBGene00016671
WBGene00019996	WBGene00004167	WBGene00022375
WBGene00019158	WBGene00013260	WBGene00022073
WBGene00019170	WBGene00002063
WBGene00020100	WBGene00004945
WBGene00020105	WBGene00008843
WBGene00021815	WBGene00044032
WBGene00007920	WBGene00012903
WBGene00001639	WBGene00004904
WBGene00008287	WBGene00012605
WBGene00006822	WBGene00000661
WBGene00000070	WBGene00004120
WBGene00021902	WBGene00009308
WBGene00022664	WBGene00003119
WBGene00019837	WBGene00013014
WBGene00004114	WBGene00000113
WBGene00000900	WBGene00010070
WBGene00000435	WBGene00010071
WBGene00017146	WBGene00013001
WBGene00017774	WBGene00303002
WBGene00018563	WBGene00013002
WBGene00022420	WBGene00013209
WBGene00220259	WBGene00001916
WBGene00015582	WBGene00008579
WBGene00015581	WBGene00013094
WBGene00003597	WBGene00001838
WBGene00008170	WBGene00012328
WBGene00009594	WBGene00012722
WBGene00000564	WBGene00012187
WBGene00011561	WBGene00012730
WBGene00006873	WBGene00010722
WBGene00006604	WBGene00010719
WBGene00013447	WBGene00012981
WBGene00004165	WBGene00012983
WBGene00007680	WBGene00012982
WBGene00007681	WBGene00011051
WBGene00013231	WBGene00010758
	WBGene00007479
	WBGene00013187
	WBGene00013192
	WBGene00013156
	WBGene00021596
	WBGene00019185
	WBGene00000663
	WBGene00016220
	WBGene00000081
	WBGene00021906
	WBGene00001412
	WBGene00015649
	WBGene00000903
	WBGene00004388
	WBGene00020455
	WBGene00003917
	WBGene00022348
	WBGene00019715
	WBGene00006513
	WBGene00000545
	WBGene00015242
	WBGene00004128
	WBGene00021436
	WBGene00000160
	WBGene00019167
	WBGene00009738
	WBGene00004765
	WBGene00009374
	WBGene00011114
	WBGene00000664
	WBGene00001076
	WBGene00019834
	WBGene00019831
	WBGene00015143
	WBGene00017778
	WBGene00015102
	WBGene00010475
	WBGene00014033
	WBGene00001734
	WBGene00001263
	WBGene00010573
	WBGene00011501
	WBGene00014801
	WBGene00000768
	WBGene00006536
	WBGene00010477
	WBGene00002219
	WBGene00010923
	WBGene00000668
	WBGene00006553
	WBGene00012124
	WBGene00012943
	WBGene00013438
	WBGene00013437
	WBGene00013435
	WBGene00013433
	WBGene00194864
	WBGene00000670
	WBGene00000671
	WBGene00007679
	WBGene00003234
	WBGene00013225
[hpl-2 hyp]	[hpl-2int]	[hpl-1int]	[hpl-2hyp][hpl-1int]	[hpl-2int][hpl-1int]	[hpl-2hyp][hpl-2int][hpl-1int]	[hpl-2hyp][hpl-2int]
WBGene00013228	WBGene00013232	WBGene00001702	WBGene00013741	WBGene00006571	WBGene00014179	WBGene00001946
WBGene00013563	WBGene00013242	WBGene00017483	WBGene00018141	WBGene00013044	WBGene00000676	WBGene00013735
WBGene00013732	WBGene00013243	WBGene00020976	WBGene00021579	WBGene00007209	WBGene00019368	WBGene00012552
WBGene00012544	WBGene00013544	WBGene00017923	WBGene00013881	WBGene00004075	WBGene00022298	WBGene00012721
WBGene00003406	WBGene00013545	WBGene00044482	WBGene00000022	WBGene00000674	WBGene00019785	WBGene00012806
WBGene00012803	WBGene00013549	WBGene00017116	WBGene00005687	WBGene00021011	WBGene00022090	WBGene00011735
WBGene00011399	WBGene00013036	WBGene00016291	WBGene00018055	WBGene00000677	WBGene00001548	WBGene00011736
WBGene00009730	WBGene00013912	WBGene00006780	WBGene00015886	WBGene00044462	WBGene00003884	WBGene00021939
WBGene00006612	WBGene00006804	WBGene00019055	WBGene00020612	WBGene00019540	WBGene00018547	WBGene00019067
WBGene00010662	WBGene00001457	WBGene00000820	WBGene00017796	WBGene00019875	WBGene00018065	WBGene00016636
WBGene00021395	WBGene00012711	WBGene00015937	WBGene00012117	WBGene00021871	WBGene00013642	WBGene00022427
WBGene00022048	WBGene00000672	WBGene00000687	WBGene00000453	WBGene00022679	WBGene00013651	WBGene00019536
WBGene00000213	WBGene00012717	WBGene00016398	WBGene00007154	WBGene00016953	WBGene00020707	WBGene00022101
WBGene00021948	WBGene00012720	WBGene00006504	WBGene00013884	WBGene00016845	WBGene00020954	WBGene00022100
WBGene00021938	WBGene00011474	WBGene00001187	WBGene00010385	WBGene00008720	WBGene00018824	WBGene00044488
WBGene00019070	WBGene00011478	WBGene00018901	WBGene00219308	WBGene00008033	WBGene00017174	WBGene00002243
WBGene00021931	WBGene00000067	WBGene00018900	WBGene00013492	WBGene00010712	WBGene00022015	WBGene00021869
WBGene00009518	WBGene00012306	WBGene00019901	WBGene00044331	WBGene00044689	WBGene00001855	WBGene00021893
WBGene00021519	WBGene00019821	WBGene00016698	WBGene00009854	WBGene00017173	WBGene00015366	WBGene00019545
WBGene00021513	WBGene00000675	WBGene00003625	WBGene00009859	WBGene00000478	WBGene00011536	WBGene00017924
WBGene00021505	WBGene00002187	WBGene00044508	WBGene00013623	WBGene00020241	WBGene00000782	WBGene00010350
WBGene00021509	WBGene00022046	WBGene00015573	WBGene00006249	WBGene00018552	WBGene00012020	WBGene00014139
WBGene00006738	WBGene00019774	WBGene00019503	WBGene00005521	WBGene00017986	WBGene00013628	WBGene00044258
WBGene00022302	WBGene00015993	WBGene00006914	WBGene00009906	WBGene00001714	WBGene00009296	WBGene00000708
WBGene00044467	WBGene00004824	WBGene00006220	WBGene00009195	WBGene00003994	WBGene00008984	WBGene00001604
WBGene00016023	WBGene00021945	WBGene00016182	WBGene00045381	WBGene00000715	WBGene00012404	WBGene00013999
WBGene00019783	WBGene00000679	WBGene00002222	WBGene00005461	WBGene00003849	WBGene00013953	WBGene00044512
WBGene00022097	WBGene00000680	WBGene00012118	WBGene00044212	WBGene00009724	WBGene00013944	WBGene00022435
WBGene00022377	WBGene00016427	WBGene00045183	WBGene00005328	WBGene00008396	WBGene00005393	WBGene00001564
WBGene00006705	WBGene00000681	WBGene00000594	WBGene00009297	WBGene00013878	WBGene00013481	WBGene00022285
WBGene00050885	WBGene00003794	WBGene00001653	WBGene00009836	WBGene00044193	WBGene00045364	WBGene00004139
WBGene00021877	WBGene00019537	WBGene00004228	WBGene00012492	WBGene00011948	WBGene00010107	WBGene00018115
WBGene00044489	WBGene00021507	WBGene00011182	WBGene00005349	WBGene00006375	WBGene00012836	WBGene00006589
WBGene00044490	WBGene00000682	WBGene00009035	WBGene00005330	WBGene00006585	WBGene00012253	WBGene00044521
WBGene00021881	WBGene00000683	WBGene00006406	WBGene00008017	WBGene00009196	WBGene00001691	WBGene00020962
WBGene00021892	WBGene00022300	WBGene00011727	WBGene00006692	WBGene00009572	WBGene00012186	WBGene00018060
WBGene00003889	WBGene00022134	WBGene00010918	WBGene00005493	WBGene00012304	WBGene00019146	WBGene00018061
WBGene00022608	WBGene00021430	WBGene00009547	WBGene00005507	WBGene00050893	WBGene00000185	WBGene00006164
WBGene00021370	WBGene00022078	WBGene00002827	WBGene00012570	WBGene00001080	WBGene00010331	WBGene00021080
WBGene00021586	WBGene00022382	WBGene00010666	WBGene00007565	WBGene00012574	WBGene00022517	WBGene00044541
WBGene00018645	WBGene00021870	WBGene00007732	WBGene00008899	WBGene00005419	WBGene00022390	WBGene00000244
WBGene00001033	WBGene00022069	WBGene00010435	WBGene00011212	WBGene00013950	WBGene00022385	WBGene00007082
WBGene00019721	WBGene00022070	WBGene00004424	WBGene00012575	WBGene00013954	WBGene00018786	WBGene00009299
WBGene00043067	WBGene00022064	WBGene00004333	WBGene00194680	WBGene00077655	WBGene00021690	WBGene00001397
WBGene00015049	WBGene00022060	WBGene00012191	WBGene00013971	WBGene00012452	WBGene00185098	WBGene00011254
WBGene00000692	WBGene00021087	WBGene00012090	WBGene00195058	WBGene00008070	WBGene00044435	WBGene00004003
WBGene00009075	WBGene00001999	WBGene00023520	WBGene00013586	WBGene00077688	WBGene00021471	WBGene00008441
WBGene00001476	WBGene00018330	WBGene00012159	WBGene00012689	WBGene00013824	WBGene00002179	WBGene00013343
WBGene00001328	WBGene00001692	WBGene00235300	WBGene00012818	WBGene00013830	WBGene00005517	WBGene00013487
WBGene00007446	WBGene00006769	WBGene00011371	WBGene00008946	WBGene00001700	WBGene00009753	WBGene00013583
WBGene00010351	WBGene00006383	WBGene00018010	WBGene00013832	WBGene00006321	WBGene00219319	WBGene00007583
WBGene00010352	WBGene00021381	WBGene00021451	WBGene00013771	WBGene00002983	WBGene00001131	WBGene00012808
WBGene00010354	WBGene00000481	WBGene00019452	WBGene00009762	WBGene00000083	WBGene00008853	WBGene00012809
WBGene00007778	WBGene00003129	WBGene00022756	WBGene00001237	WBGene00007934	WBGene00012102	WBGene00012815
WBGene00009889	WBGene00021358	WBGene00005896	WBGene00018607	WBGene00001251	WBGene00014201	WBGene00007177
WBGene00006766	WBGene00021365	WBGene00006268	WBGene00004335	WBGene00009787	WBGene00006616	WBGene00013765
WBGene00194915	WBGene00021371	WBGene00016686	WBGene00018227	WBGene00019574	WBGene00008188	WBGene00005147
WBGene00013375	WBGene00021369	WBGene00005634	WBGene00018283	WBGene00003891	WBGene00006824	WBGene00007126
WBGene00012867	WBGene00006970	WBGene00018056	WBGene00007750	WBGene00021027	WBGene00009306	WBGene00022203
WBGene00003086	WBGene00018145	WBGene00005423	WBGene00020794	WBGene00302974	WBGene00006789	WBGene00020494
WBGene00013304	WBGene00021581	WBGene00019179	WBGene00000294	WBGene00022388	WBGene00001488	WBGene00018938
WBGene00194649	WBGene00003955	WBGene00018539	WBGene00018310	WBGene00022155	WBGene00004237	WBGene00219451
WBGene00013315	WBGene00019531	WBGene00019470	WBGene00022278	WBGene00022161	WBGene00013969	WBGene00018589
WBGene00005101	WBGene00019530	WBGene00005623	WBGene00001773	WBGene00022143	WBGene00021986	WBGene00020767
WBGene00013632	WBGene00000611	WBGene00021555	WBGene00022112	WBGene00004014	WBGene00018783	WBGene00019735
WBGene00013658	WBGene00000123	WBGene00019235	WBGene00017909	WBGene00019461	WBGene00019343	WBGene00015293
WBGene00013418	WBGene00000610	WBGene00017262	WBGene00003516	WBGene00000625	WBGene00017255	WBGene00006408
WBGene00013100	WBGene00017482	WBGene00017772	WBGene00016565	WBGene00021039	WBGene00022712	WBGene00006588
WBGene00004403	WBGene00020977	WBGene00000980	WBGene00022634	WBGene00021035	WBGene00019511	WBGene00006587
WBGene00013805	WBGene00022680	WBGene00021068	WBGene00007911	WBGene00008878	WBGene00021296	WBGene00022315
WBGene00007820	WBGene00000685	WBGene00018488	WBGene00206530	WBGene00013932	WBGene00017179	WBGene00000754
WBGene00006419	WBGene00020679	WBGene00044545	WBGene00004509	WBGene00008293	WBGene00021117	WBGene00003514
WBGene00015258	WBGene00006053	WBGene00022845	WBGene00010168	WBGene00010769	WBGene00021171	WBGene00008622
WBGene00015255	WBGene00004374	WBGene00019655	WBGene00012500	WBGene00009361	WBGene00013266	WBGene00002280
WBGene00005258	WBGene00020435	WBGene00020528	WBGene00020205	WBGene00012036	WBGene00012288	WBGene00003370
WBGene00003696	WBGene00004804	WBGene00006801	WBGene00019700	WBGene00013403	WBGene00012332	WBGene00020732
WBGene00001480	WBGene00019153	WBGene00005925	WBGene00018442	WBGene00014102	WBGene00000662	WBGene00022275
WBGene00235315	WBGene00000256	WBGene00017316	WBGene00269388	WBGene00013672	WBGene00013221	WBGene00016906
WBGene00019977	WBGene00006052	WBGene00015464	WBGene00269389	WBGene00017208	WBGene00021043	WBGene00020090
WBGene00016513	WBGene00000551	WBGene00005108	WBGene00015827	WBGene00019335	WBGene00017937	WBGene00021028
WBGene00021602	WBGene00000603	WBGene00016505	WBGene00022690	WBGene00001546	WBGene00020116	WBGene00022037
WBGene00021492	WBGene00004471	WBGene00044553	WBGene00206415	WBGene00020233	WBGene00020117	WBGene00020281
WBGene00000056	WBGene00006930	WBGene00018293	WBGene00017213	WBGene00004210	WBGene00021853	WBGene00022386
WBGene00206511	WBGene00019510	WBGene00018294	WBGene00016337	WBGene00019513	WBGene00019997	WBGene00022391
WBGene00016050	WBGene00016178	WBGene00015220	WBGene00019591	WBGene00015200	WBGene00021808	WBGene00044896
WBGene00016859	WBGene00000693	WBGene00003386	WBGene00016574	WBGene00020408	WBGene00013448	WBGene00003111
WBGene00020877	WBGene00011456	WBGene00016094	WBGene00005543	WBGene00001541	WBGene00012761	WBGene00006771
WBGene00020883	WBGene00000696	WBGene00000717	WBGene00015134	WBGene00020290		WBGene00044347
WBGene00015879	WBGene00000697	WBGene00044582	WBGene00019410	WBGene00015841		WBGene00021763
WBGene00015435	WBGene00000698	WBGene00017194	WBGene00016890	WBGene00021116		WBGene00021239
WBGene00020620	WBGene00011597	WBGene00000766	WBGene00011579	WBGene00021142		WBGene00021346
WBGene00021079	WBGene00011259	WBGene00008233	WBGene00001133	WBGene00011304		WBGene00021469
WBGene00021078	WBGene00007448	WBGene00006470	WBGene00022344	WBGene00010989		WBGene00077563
WBGene00021559	WBGene00009038	WBGene00009584	WBGene00021900	WBGene00011522		WBGene00021473
WBGene00019274	WBGene00003148	WBGene00005618	WBGene00015580	WBGene00012586		WBGene00017736
WBGene00003574	WBGene00004755	WBGene00007073	WBGene00000542	WBGene00012595		WBGene00016950
WBGene00019649	WBGene00010920	WBGene00012530	WBGene00044903	WBGene00013011		WBGene00004226
WBGene00000862	WBGene00000703	WBGene00011891	WBGene00006784	WBGene00006787		WBGene00000832
WBGene00015450	WBGene00009955	WBGene00011895	WBGene00219421	WBGene00013157		WBGene00021271
WBGene00004795	WBGene00007987	WBGene00013863		WBGene00018246		WBGene00023172
WBGene00017468	WBGene00003150	WBGene00009241		WBGene00004045		WBGene00018232
WBGene00004099	WBGene00000705	WBGene00009331		WBGene00020550		WBGene00022126
WBGene00000029	WBGene00000706	WBGene00000726		WBGene00019328		WBGene00045399
WBGene00000031	WBGene00000417	WBGene00010741		WBGene00015268		WBGene00016561
WBGene00021732	WBGene00004156	WBGene00001645		WBGene00002915		WBGene00000254
WBGene00015076	WBGene00013379	WBGene00008335		WBGene00020104		WBGene00006754
WBGene00015074	WBGene00007195	WBGene00008333		WBGene00000666		WBGene00009188
WBGene00015073	WBGene00000707	WBGene00000146		WBGene00004980		WBGene00003777
WBGene00018424	WBGene00013290	WBGene00010079		WBGene00010974		WBGene00013125
WBGene00015424	WBGene00012768	WBGene00004855		WBGene00003589		WBGene00013181
WBGene00015677	WBGene00012769	WBGene00003886		WBGene00008422		WBGene00010654
WBGene00020270	WBGene00010415	WBGene00008646		WBGene00013445		WBGene00008854
WBGene00004740	WBGene00000710	WBGene00014123		WBGene00194733		WBGene00001045
WBGene00018698	WBGene00012791	WBGene00014098				WBGene00007603
WBGene00017195	WBGene00013776	WBGene00011014				WBGene00012106
WBGene00010593	WBGene00219547	WBGene00008101				WBGene00012107
WBGene00011003	WBGene00013790	WBGene00011590				WBGene00004181
WBGene00008254	WBGene00006698	WBGene00011305				WBGene00012209
WBGene00001178	WBGene00002005	WBGene00011648				WBGene00012480
WBGene00044286	WBGene00003525	WBGene00045488				WBGene00009064
WBGene00001747	WBGene00021003	WBGene00010868				WBGene00011434
WBGene00004910	WBGene00019814	WBGene00010426				WBGene00012238
WBGene00003536	WBGene00020706	WBGene00010283				WBGene00013502
WBGene00011712	WBGene00021450	WBGene00008629				WBGene00009865
WBGene00008339	WBGene00019743	WBGene00219324				WBGene00002978
WBGene00009532	WBGene00003648	WBGene00013024				WBGene00020171
WBGene00011270	WBGene00005898	WBGene00008269				WBGene00000106
WBGene00011587	WBGene00005643	WBGene00011251				WBGene00020231
WBGene00011306	WBGene00020062	WBGene00008183				WBGene00044367
WBGene00007929	WBGene00019563	WBGene00004336				WBGene00003709
WBGene00044082	WBGene00021748	WBGene00010380				WBGene00022452
WBGene00013876	WBGene00019626	WBGene00004747				WBGene00022714
WBGene00009081	WBGene00022286	WBGene00006147				WBGene00016576
WBGene00001519	WBGene00020017	WBGene00006093				WBGene00020407
WBGene00011318	WBGene00021605	WBGene00012045				WBGene00017451
WBGene00005278	WBGene00021601	WBGene00009485				WBGene00017557
WBGene00009978	WBGene00044344	WBGene00009226				WBGene00000647
WBGene00006103	WBGene00020391	WBGene00007833				WBGene00017947
WBGene00006077	WBGene00021304	WBGene00194715				WBGene00015116
WBGene00011754	WBGene00021302	WBGene00013607				WBGene00001948
WBGene00012346	WBGene00018099	WBGene00009855				WBGene00011755
WBGene00005745	WBGene00018097	WBGene00005145				WBGene00002265
WBGene00012309	WBGene00016697	WBGene00013622				WBGene00012219
WBGene00012025	WBGene00021168	WBGene00013941				WBGene00012457
WBGene00012021	WBGene00018761	WBGene00013469				WBGene00016825
WBGene00005425	WBGene00018758	WBGene00005414				WBGene00012285
WBGene00004026	WBGene00302982	WBGene00008010				WBGene00012905
WBGene00013608	WBGene00003579	WBGene00006688				WBGene00012920
WBGene00009860	WBGene00021562	WBGene00008892				WBGene00009390
WBGene00005770	WBGene00005919	WBGene00011211				WBGene00010269
WBGene00003706	WBGene00004130	WBGene00013483				WBGene00002264
WBGene00005578	WBGene00002246	WBGene00008066				WBGene00012993
WBGene00011486	WBGene00020696	WBGene00005832				WBGene00008448
WBGene00013938	WBGene00020700	WBGene00012250				WBGene00013096
WBGene00013940	WBGene00003025	WBGene00044655				WBGene00012333
WBGene00013943	WBGene00021482	WBGene00013834				WBGene00010720
WBGene00009571	WBGene00000498	WBGene00005392				WBGene00012979
WBGene00005321	WBGene00019970	WBGene00009760				WBGene00000208
WBGene00011841	WBGene00020239	WBGene00012185				WBGene00013166
WBGene00050934	WBGene00021627	WBGene00000484				WBGene00007064
WBGene00013472	WBGene00006796	WBGene00015138				WBGene00016221
WBGene00013470	WBGene00000712	WBGene00017896				WBGene00006894
WBGene00044654	WBGene00022584	WBGene00003408				WBGene00001561
WBGene00044202	WBGene00000030	WBGene00017780				WBGene00016030
WBGene00009835	WBGene00015371	WBGene00019435				WBGene00015266
WBGene00012491	WBGene00000455	WBGene00019188				WBGene00022488
WBGene00012081	WBGene00019600	WBGene00016485				WBGene00021261
WBGene00008016	WBGene00018427	WBGene00022508				WBGene00021592
WBGene00008012	WBGene00000893	WBGene00001569				WBGene00021439
WBGene00194801	WBGene00000713	WBGene00044621				WBGene00016524
WBGene00010300	WBGene00017834	WBGene00018738				WBGene00022175
WBGene00007570	WBGene00020948	WBGene00001551				WBGene00004976
WBGene00008893	WBGene00000714	WBGene00018715				WBGene00015386
WBGene00007182	WBGene00020245	WBGene00018744				WBGene00010838
WBGene00194695	WBGene00003242	WBGene00015172				WBGene00010839
WBGene00005829	WBGene00018292	WBGene00000175				WBGene00010362
WBGene00013077	WBGene00000718	WBGene00006948				WBGene00012863
WBGene00006714	WBGene00016045	WBGene00015790				WBGene00004736
WBGene00012455	WBGene00011573	WBGene00001400				WBGene00012271
WBGene00013972	WBGene00006777	WBGene00006952				WBGene00012972
WBGene00008700	WBGene00000722	WBGene00020845				WBGene00012356
WBGene00012688	WBGene00000724	WBGene00015354				WBGene00012933
WBGene00012684	WBGene00000602	WBGene00020567				WBGene00012125
WBGene00003685	WBGene00000601	WBGene00022499				WBGene00001077
WBGene00003669	WBGene00009058	WBGene00021319				WBGene00004960
WBGene00012067	WBGene00011715	WBGene00020672				WBGene00013424
WBGene00219452	WBGene00004032	WBGene00018514
WBGene00009018	WBGene00000614	WBGene00006424
WBGene00044197	WBGene00003515	WBGene00015625
WBGene00008068	WBGene00005018	WBGene00000741
WBGene00007723	WBGene00001137	WBGene00020506
WBGene00012838	WBGene00000732	WBGene00016976
WBGene00012246	WBGene00000733	WBGene00006746
WBGene00012251	WBGene00044109	WBGene00015865
WBGene00013828	WBGene00044194	WBGene00020335
WBGene00005389	WBGene00003834	WBGene00018485
WBGene00013750	WBGene00011132	WBGene00019148
WBGene00013758	WBGene00009221	WBGene00017569
WBGene00009166	WBGene00011942	WBGene00011643
WBGene00001248	WBGene00011688	WBGene00003553
WBGene00001547	WBGene00009031	WBGene00011462
WBGene00022213	WBGene00008724	WBGene00010224
WBGene00004011	WBGene00012315	WBGene00007944
WBGene00022504	WBGene00045382	WBGene00007957
WBGene00016487	WBGene00009834	WBGene00219301
WBGene00044701	WBGene00007675	WBGene00000277
WBGene00020135	WBGene00012405	WBGene00012303
WBGene00019321	WBGene00010296	WBGene00004008
WBGene00016559	WBGene00006150	WBGene00008901
WBGene00001803	WBGene00005500	WBGene00004108
WBGene00018258	WBGene00007853	WBGene00007848
WBGene00003732	WBGene00005397	WBGene00012445
WBGene00000283	WBGene00013489	WBGene00001451
WBGene00015564	WBGene00013973	WBGene00013496
WBGene00016531	WBGene00009016	WBGene00007664
WBGene00001000	WBGene00009021	WBGene00010434
WBGene00019987	WBGene00012825	WBGene00001148
WBGene00006764	WBGene00003959	WBGene00007260
WBGene00006881	WBGene00006786	WBGene00007486
WBGene00008952	WBGene00007017	WBGene00007523
WBGene00000217	WBGene00000736	WBGene00017340
WBGene00010492	WBGene00015430	WBGene00000253
WBGene00007849	WBGene00004377	WBGene00020091
WBGene00007904	WBGene00017298	WBGene00022032
WBGene00007751	WBGene00019436	WBGene00044434
WBGene00009303	WBGene00006955	WBGene00020283
WBGene00010702	WBGene00000737	WBGene00021692
WBGene00004776	WBGene00001065	WBGene00021007
WBGene00015673	WBGene00003968	WBGene00003156
WBGene00304806	WBGene00020511	WBGene00001232
WBGene00016269	WBGene00044901	WBGene00003422
WBGene00015868	WBGene00004951	WBGene00000284
WBGene00018771	WBGene00000033	WBGene00017026
WBGene00016903	WBGene00018024	WBGene00044423
WBGene00016902	WBGene00003907	WBGene00001430
WBGene00235388	WBGene00000738	WBGene00003072
WBGene00002040	WBGene00018877	WBGene00003029
WBGene00022519	WBGene00000066	WBGene00016605
WBGene00236808	WBGene00022501	WBGene00021628
WBGene00021335	WBGene00006926	WBGene00006058
WBGene00004952	WBGene00044299	WBGene00016733
WBGene00022838	WBGene00001070	WBGene00001833
WBGene00022837	WBGene00002125	WBGene00016327
WBGene00000165	WBGene00000739	WBGene00015096
WBGene00021685	WBGene00000742	WBGene00004965
WBGene00001707	WBGene00000744	WBGene00185086
WBGene00019674	WBGene00003495	WBGene00018895
WBGene00004969	WBGene00020884	WBGene00020419
WBGene00018580	WBGene00000746	WBGene00002258
WBGene00018579	WBGene00015168	WBGene00016494
WBGene00001115	WBGene00044068	WBGene00020659
WBGene00006461	WBGene00004949	WBGene00006423
WBGene00017398	WBGene00006925	WBGene00011061
WBGene00017741	WBGene00017714	WBGene00011063
WBGene00022281	WBGene00001854	WBGene00007742
WBGene00000788	WBGene00017401	WBGene00000156
WBGene00022129	WBGene00011763	WBGene00003136
WBGene00022131	WBGene00013871	WBGene00008890
WBGene00022110	WBGene00000749	WBGene00008531
WBGene00004049	WBGene00000018	WBGene00219283
WBGene00022108	WBGene00011880	WBGene00009343
WBGene00003387	WBGene00001690	WBGene00009479
WBGene00021835	WBGene00001981	WBGene00007278
WBGene00020914	WBGene00000753	WBGene00002142
WBGene00021038	WBGene00010067	WBGene00014965
WBGene00017650	WBGene00044149	WBGene00010324
WBGene00016839	WBGene00003623	WBGene00009116
WBGene00000779	WBGene00010690	WBGene00016458
WBGene00006820	WBGene00000756	WBGene00044250
WBGene00019769	WBGene00006517	WBGene00008783
WBGene00006797	WBGene00001898	WBGene00009607
WBGene00006508	WBGene00006634	WBGene00010170
WBGene00006819	WBGene00007350	WBGene00011657
WBGene00001598	WBGene00008976	WBGene00008472
WBGene00007977	WBGene00001096	WBGene00010768
WBGene00010731	WBGene00000618	WBGene00003578
WBGene00016461	WBGene00011683	WBGene00012477
WBGene00077519	WBGene00007877	WBGene00004063
WBGene00013179	WBGene00007878	WBGene00012505
WBGene00000410	WBGene00004123	WBGene00008909
WBGene00000010	WBGene00007484	WBGene00014235
WBGene00007766	WBGene00020770	WBGene00014196
WBGene00010651	WBGene00000281	WBGene00009695
WBGene00000641	WBGene00045272	WBGene00010808
WBGene00010653	WBGene00015676	WBGene00011433
WBGene00009315	WBGene00006067	WBGene00014101
WBGene00008858	WBGene00003600	WBGene00001147
WBGene00002232	WBGene00018192	WBGene00009304
WBGene00206532	WBGene00022276	WBGene00020835
WBGene00009416	WBGene00021681	WBGene00021101
WBGene00012961	WBGene00000622	WBGene00021092
WBGene00010821	WBGene00003229	WBGene00021576
WBGene00009616	WBGene00002079	WBGene00019313
WBGene00011781	WBGene00020088	WBGene00018575
WBGene00008476	WBGene00006385	WBGene00018816
WBGene00003098	WBGene00022040	WBGene00015595
WBGene00006829	WBGene00001725	WBGene00194714
WBGene00012214	WBGene00022029	WBGene00019036
WBGene00077769	WBGene00022026	WBGene00019042
WBGene00009359	WBGene00021208	WBGene00018439
WBGene00009363	WBGene00000624	WBGene00018437
WBGene00011586	WBGene00021213	WBGene00305113
WBGene00012478	WBGene00022389	WBGene00015609
WBGene00009061	WBGene00021333	WBGene00016882
WBGene00006048	WBGene00021328	WBGene00022685
WBGene00007214	WBGene00001745	WBGene00016547
WBGene00007213	WBGene00004429	WBGene00019586
WBGene00012289	WBGene00271777	WBGene00271744
WBGene00013599	WBGene00021693	WBGene00235164
WBGene00012391	WBGene00022274	WBGene00017527
WBGene00012576	WBGene00022148	WBGene00018019
WBGene00012365	WBGene00022139	WBGene00020229
WBGene00045058	WBGene00022140	WBGene00019687
WBGene00007991	WBGene00021472	WBGene00022442
WBGene00004202	WBGene00021474	WBGene00305132
WBGene00014103	WBGene00021460	WBGene00021298
WBGene00008187	WBGene00017735	WBGene00017452
WBGene00010578	WBGene00006047	WBGene00305091
WBGene00013666	WBGene00021270	WBGene00019795
WBGene00013668	WBGene00017978	WBGene00019794
WBGene00013692	WBGene00004946	WBGene00020777
WBGene00020837	WBGene00022133	WBGene00018810
WBGene00018507	WBGene00021128	WBGene00016778
WBGene00017875	WBGene00021837	WBGene00017944
WBGene00017873	WBGene00004775	WBGene00018044
WBGene00016308	WBGene00021639	WBGene00018269
WBGene00019699	WBGene00000368	WBGene00016355
WBGene00006195	WBGene00004272	WBGene00019895
WBGene00019306	WBGene00004147	WBGene00019086
WBGene00003545	WBGene00021630	WBGene00017291
WBGene00018734	WBGene00020131	WBGene00000935
WBGene00023410	WBGene00021113	WBGene00002053
WBGene00021968	WBGene00019771	WBGene00018873
WBGene00018819	WBGene00017885	WBGene00001208
WBGene00018815	WBGene00003934	WBGene00016315
WBGene00019209	WBGene00001599	WBGene00019426
WBGene00019207	WBGene00020936	WBGene00003621
WBGene00019415	WBGene00003622	WBGene00019905
WBGene00020327	WBGene00002348	WBGene00015795
WBGene00020329	WBGene00011376	WBGene00001872
WBGene00015599	WBGene00009457	WBGene00016277
WBGene00019037	WBGene00002226	WBGene00018394
WBGene00019035	WBGene00010612	WBGene00017023
WBGene00018436	WBGene00013894	WBGene00022887
WBGene00018105	WBGene00009113	WBGene00006947
WBGene00018102	WBGene00015024	WBGene00006363
WBGene00020361	WBGene00018847	WBGene00003044
WBGene00015830	WBGene00013127	WBGene00008435
WBGene00018667	WBGene00004706	WBGene00010503
WBGene00020533	WBGene00013180	WBGene00003241
WBGene00044360	WBGene00010157	WBGene00004264
WBGene00016341	WBGene00007768	WBGene00000894
WBGene00016342	WBGene00009314	WBGene00009901
WBGene00019592	WBGene00000415	WBGene00195147
WBGene00019593	WBGene00013135	WBGene00008803
WBGene00305114	WBGene00013138	WBGene00011888
WBGene00017525	WBGene00305049	WBGene00007690
WBGene00004129	WBGene00010246	WBGene00001527
WBGene00018769	WBGene00009611	WBGene00011980
WBGene00005574	WBGene00011658	WBGene00007374
WBGene00005573	WBGene00012105	WBGene00008458
WBGene00017918	WBGene00001008	WBGene00014246
WBGene00017911	WBGene00010419	WBGene00014171
WBGene00022716	WBGene00012193	WBGene00000655
WBGene00015197	WBGene00003948	WBGene00002297
WBGene00015199	WBGene00010806	WBGene00009354
WBGene00005542	WBGene00012343	WBGene00011530
WBGene00002102	WBGene00012387	WBGene00007342
WBGene00017181	WBGene00012578	WBGene00007149
WBGene00018198	WBGene00009824	WBGene00010056
WBGene00021589	WBGene00006565	WBGene00008545
WBGene00015856	WBGene00007988	WBGene00012149
WBGene00021721	WBGene00008610	WBGene00009657
WBGene00017406	WBGene00005078	WBGene00012085
WBGene00044811	WBGene00000034	WBGene00000528
WBGene00271824	WBGene00016075	WBGene00013255
WBGene00006495	WBGene00019498	WBGene00013273
WBGene00017948	WBGene00018496	WBGene00012585
WBGene00206414	WBGene00235351	WBGene00012592
WBGene00021057	WBGene00000617	WBGene00045289
WBGene00018048	WBGene00004076	WBGene00012199
WBGene00004737	WBGene00020326	WBGene00000037
WBGene00022874	WBGene00020328	WBGene00011050
WBGene00004346	WBGene00022553	WBGene00011049
WBGene00020479	WBGene00003734	WBGene00010194
WBGene00001597	WBGene00018433	WBGene00018243
WBGene00004244	WBGene00006882	WBGene00018248
WBGene00018397	WBGene00017055	WBGene00003936
WBGene00023408	WBGene00022443	WBGene00018363
WBGene00011468	WBGene00020430	WBGene00000895
WBGene00007688	WBGene00016575	WBGene00017758
WBGene00004174	WBGene00005540	WBGene00022322
WBGene00007334	WBGene00005544	WBGene00021256
WBGene00006853	WBGene00005590	WBGene00010451
WBGene00008137	WBGene00015909	WBGene00009502
WBGene00003979	WBGene00018196	WBGene00007138
WBGene00010787	WBGene00021730	WBGene00303105
WBGene00012220	WBGene00015848	WBGene00000396
WBGene00012462	WBGene00303369	WBGene00022598
WBGene00006601	WBGene00019793	WBGene00002048
WBGene00013247	WBGene00017587	WBGene00016199
WBGene00016826	WBGene00017584	WBGene00015481
WBGene00008838	WBGene00016709	WBGene00015637
WBGene00011878	WBGene00020771	WBGene00017950
WBGene00012894	WBGene00022739	WBGene00000872
WBGene00012914	WBGene00001976	WBGene00020107
WBGene00008929	WBGene00003424	WBGene00018951
WBGene00012987	WBGene00000606	WBGene00003497
WBGene00012997	WBGene00000609	WBGene00022816
WBGene00010069	WBGene00000649	WBGene00045247
WBGene00013208	WBGene00001101	WBGene00015557
WBGene00011052	WBGene00003456	WBGene00019677
WBGene00008578	WBGene00003469	WBGene00000939
WBGene00044074	WBGene00004702	WBGene00016799
WBGene00010721	WBGene00019273	WBGene00016242
WBGene00012227	WBGene00015796	WBGene00003562
WBGene00010193	WBGene00016173	WBGene00015523
WBGene00013190	WBGene00011638	WBGene00022718
WBGene00021597	WBGene00009042	WBGene00003001
WBGene00016226	WBGene00000616	WBGene00007401
WBGene00020541	WBGene00000251	WBGene00003482
WBGene00020546	WBGene00000657	WBGene00013499
WBGene00002230	WBGene00004300	WBGene00009654
WBGene00020457	WBGene00000472	WBGene00001996
WBGene00019915	WBGene00000851	WBGene00012272
WBGene00022353	WBGene00006414	WBGene00000669
WBGene00005141	WBGene00005016	WBGene00006683
WBGene00005143	WBGene00004698	WBGene00013431
WBGene00019709	WBGene00010053	WBGene00044233
WBGene00021433	WBGene00013926	WBGene00006762
WBGene00021700	WBGene00012148	WBGene00010072
WBGene00021866	WBGene00008743	WBGene00013578
WBGene00021022	WBGene00002262	WBGene00011475
WBGene00017103	WBGene00000114	WBGene00011729
WBGene00021850	WBGene00012395	WBGene00007065
WBGene00003941	WBGene00012222	WBGene00016638
WBGene00022177	WBGene00003228	WBGene00000546
WBGene00022181	WBGene00000565	WBGene00016671
WBGene00019996	WBGene00004167	WBGene00022375
WBGene00019158	WBGene00013260	WBGene00022073
WBGene00019170	WBGene00002063
WBGene00020100	WBGene00004945
WBGene00020105	WBGene00008843
WBGene00021815	WBGene00044032
WBGene00007920	WBGene00012903
WBGene00001639	WBGene00004904
WBGene00008287	WBGene00012605
WBGene00006822	WBGene00000661
WBGene00000070	WBGene00004120
WBGene00021902	WBGene00009308
WBGene00022664	WBGene00003119
WBGene00019837	WBGene00013014
WBGene00004114	WBGene00000113
WBGene00000900	WBGene00010070
WBGene00000435	WBGene00010071
WBGene00017146	WBGene00013001
WBGene00017774	WBGene00303002
WBGene00018563	WBGene00013002
WBGene00022420	WBGene00013209
WBGene00220259	WBGene00001916
WBGene00015582	WBGene00008579
WBGene00015581	WBGene00013094
WBGene00003597	WBGene00001838
WBGene00008170	WBGene00012328
WBGene00009594	WBGene00012722
WBGene00000564	WBGene00012187
WBGene00011561	WBGene00012730
WBGene00006873	WBGene00010722
WBGene00006604	WBGene00010719
WBGene00013447	WBGene00012981
WBGene00004165	WBGene00012983
WBGene00007680	WBGene00012982
WBGene00007681	WBGene00011051
WBGene00013231	WBGene00010758
	WBGene00007479
	WBGene00013187
	WBGene00013192
	WBGene00013156
	WBGene00021596
	WBGene00019185
	WBGene00000663
	WBGene00016220
	WBGene00000081
	WBGene00021906
	WBGene00001412
	WBGene00015649
	WBGene00000903
	WBGene00004388
	WBGene00020455
	WBGene00003917
	WBGene00022348
	WBGene00019715
	WBGene00006513
	WBGene00000545
	WBGene00015242
	WBGene00004128
	WBGene00021436
	WBGene00000160
	WBGene00019167
	WBGene00009738
	WBGene00004765
	WBGene00009374
	WBGene00011114
	WBGene00000664
	WBGene00001076
	WBGene00019834
	WBGene00019831
	WBGene00015143
	WBGene00017778
	WBGene00015102
	WBGene00010475
	WBGene00014033
	WBGene00001734
	WBGene00001263
	WBGene00010573
	WBGene00011501
	WBGene00014801
	WBGene00000768
	WBGene00006536
	WBGene00010477
	WBGene00002219
	WBGene00010923
	WBGene00000668
	WBGene00006553
	WBGene00012124
	WBGene00012943
	WBGene00013438
	WBGene00013437
	WBGene00013435
	WBGene00013433
	WBGene00194864
	WBGene00000670
	WBGene00000671
	WBGene00007679
	WBGene00003234
	WBGene00013225
[hpl-2 hyp]	[hpl-2int]	[hpl-1int]	[hpl-2hyp][hpl-1int]	[hpl-2int][hpl-1int]	[hpl-2hyp][hpl-2int][hpl-1int]	[hpl-2hyp][hpl-2int]
WBGene00013228	WBGene00013232	WBGene00001702	WBGene00013741	WBGene00006571	WBGene00014179	WBGene00001946
WBGene00013563	WBGene00013242	WBGene00017483	WBGene00018141	WBGene00013044	WBGene00000676	WBGene00013735
WBGene00013732	WBGene00013243	WBGene00020976	WBGene00021579	WBGene00007209	WBGene00019368	WBGene00012552
WBGene00012544	WBGene00013544	WBGene00017923	WBGene00013881	WBGene00004075	WBGene00022298	WBGene00012721
WBGene00003406	WBGene00013545	WBGene00044482	WBGene00000022	WBGene00000674	WBGene00019785	WBGene00012806
WBGene00012803	WBGene00013549	WBGene00017116	WBGene00005687	WBGene00021011	WBGene00022090	WBGene00011735
WBGene00011399	WBGene00013036	WBGene00016291	WBGene00018055	WBGene00000677	WBGene00001548	WBGene00011736
WBGene00009730	WBGene00013912	WBGene00006780	WBGene00015886	WBGene00044462	WBGene00003884	WBGene00021939
WBGene00006612	WBGene00006804	WBGene00019055	WBGene00020612	WBGene00019540	WBGene00018547	WBGene00019067
WBGene00010662	WBGene00001457	WBGene00000820	WBGene00017796	WBGene00019875	WBGene00018065	WBGene00016636
WBGene00021395	WBGene00012711	WBGene00015937	WBGene00012117	WBGene00021871	WBGene00013642	WBGene00022427
WBGene00022048	WBGene00000672	WBGene00000687	WBGene00000453	WBGene00022679	WBGene00013651	WBGene00019536
WBGene00000213	WBGene00012717	WBGene00016398	WBGene00007154	WBGene00016953	WBGene00020707	WBGene00022101
WBGene00021948	WBGene00012720	WBGene00006504	WBGene00013884	WBGene00016845	WBGene00020954	WBGene00022100
WBGene00021938	WBGene00011474	WBGene00001187	WBGene00010385	WBGene00008720	WBGene00018824	WBGene00044488
WBGene00019070	WBGene00011478	WBGene00018901	WBGene00219308	WBGene00008033	WBGene00017174	WBGene00002243
WBGene00021931	WBGene00000067	WBGene00018900	WBGene00013492	WBGene00010712	WBGene00022015	WBGene00021869
WBGene00009518	WBGene00012306	WBGene00019901	WBGene00044331	WBGene00044689	WBGene00001855	WBGene00021893
WBGene00021519	WBGene00019821	WBGene00016698	WBGene00009854	WBGene00017173	WBGene00015366	WBGene00019545
WBGene00021513	WBGene00000675	WBGene00003625	WBGene00009859	WBGene00000478	WBGene00011536	WBGene00017924
WBGene00021505	WBGene00002187	WBGene00044508	WBGene00013623	WBGene00020241	WBGene00000782	WBGene00010350
WBGene00021509	WBGene00022046	WBGene00015573	WBGene00006249	WBGene00018552	WBGene00012020	WBGene00014139
WBGene00006738	WBGene00019774	WBGene00019503	WBGene00005521	WBGene00017986	WBGene00013628	WBGene00044258
WBGene00022302	WBGene00015993	WBGene00006914	WBGene00009906	WBGene00001714	WBGene00009296	WBGene00000708
WBGene00044467	WBGene00004824	WBGene00006220	WBGene00009195	WBGene00003994	WBGene00008984	WBGene00001604
WBGene00016023	WBGene00021945	WBGene00016182	WBGene00045381	WBGene00000715	WBGene00012404	WBGene00013999
WBGene00019783	WBGene00000679	WBGene00002222	WBGene00005461	WBGene00003849	WBGene00013953	WBGene00044512
WBGene00022097	WBGene00000680	WBGene00012118	WBGene00044212	WBGene00009724	WBGene00013944	WBGene00022435
WBGene00022377	WBGene00016427	WBGene00045183	WBGene00005328	WBGene00008396	WBGene00005393	WBGene00001564
WBGene00006705	WBGene00000681	WBGene00000594	WBGene00009297	WBGene00013878	WBGene00013481	WBGene00022285
WBGene00050885	WBGene00003794	WBGene00001653	WBGene00009836	WBGene00044193	WBGene00045364	WBGene00004139
WBGene00021877	WBGene00019537	WBGene00004228	WBGene00012492	WBGene00011948	WBGene00010107	WBGene00018115
WBGene00044489	WBGene00021507	WBGene00011182	WBGene00005349	WBGene00006375	WBGene00012836	WBGene00006589
WBGene00044490	WBGene00000682	WBGene00009035	WBGene00005330	WBGene00006585	WBGene00012253	WBGene00044521
WBGene00021881	WBGene00000683	WBGene00006406	WBGene00008017	WBGene00009196	WBGene00001691	WBGene00020962
WBGene00021892	WBGene00022300	WBGene00011727	WBGene00006692	WBGene00009572	WBGene00012186	WBGene00018060
WBGene00003889	WBGene00022134	WBGene00010918	WBGene00005493	WBGene00012304	WBGene00019146	WBGene00018061
WBGene00022608	WBGene00021430	WBGene00009547	WBGene00005507	WBGene00050893	WBGene00000185	WBGene00006164
WBGene00021370	WBGene00022078	WBGene00002827	WBGene00012570	WBGene00001080	WBGene00010331	WBGene00021080
WBGene00021586	WBGene00022382	WBGene00010666	WBGene00007565	WBGene00012574	WBGene00022517	WBGene00044541
WBGene00018645	WBGene00021870	WBGene00007732	WBGene00008899	WBGene00005419	WBGene00022390	WBGene00000244
WBGene00001033	WBGene00022069	WBGene00010435	WBGene00011212	WBGene00013950	WBGene00022385	WBGene00007082
WBGene00019721	WBGene00022070	WBGene00004424	WBGene00012575	WBGene00013954	WBGene00018786	WBGene00009299
WBGene00043067	WBGene00022064	WBGene00004333	WBGene00194680	WBGene00077655	WBGene00021690	WBGene00001397
WBGene00015049	WBGene00022060	WBGene00012191	WBGene00013971	WBGene00012452	WBGene00185098	WBGene00011254
WBGene00000692	WBGene00021087	WBGene00012090	WBGene00195058	WBGene00008070	WBGene00044435	WBGene00004003
WBGene00009075	WBGene00001999	WBGene00023520	WBGene00013586	WBGene00077688	WBGene00021471	WBGene00008441
WBGene00001476	WBGene00018330	WBGene00012159	WBGene00012689	WBGene00013824	WBGene00002179	WBGene00013343
WBGene00001328	WBGene00001692	WBGene00235300	WBGene00012818	WBGene00013830	WBGene00005517	WBGene00013487
WBGene00007446	WBGene00006769	WBGene00011371	WBGene00008946	WBGene00001700	WBGene00009753	WBGene00013583
WBGene00010351	WBGene00006383	WBGene00018010	WBGene00013832	WBGene00006321	WBGene00219319	WBGene00007583
WBGene00010352	WBGene00021381	WBGene00021451	WBGene00013771	WBGene00002983	WBGene00001131	WBGene00012808
WBGene00010354	WBGene00000481	WBGene00019452	WBGene00009762	WBGene00000083	WBGene00008853	WBGene00012809
WBGene00007778	WBGene00003129	WBGene00022756	WBGene00001237	WBGene00007934	WBGene00012102	WBGene00012815
WBGene00009889	WBGene00021358	WBGene00005896	WBGene00018607	WBGene00001251	WBGene00014201	WBGene00007177
WBGene00006766	WBGene00021365	WBGene00006268	WBGene00004335	WBGene00009787	WBGene00006616	WBGene00013765
WBGene00194915	WBGene00021371	WBGene00016686	WBGene00018227	WBGene00019574	WBGene00008188	WBGene00005147
WBGene00013375	WBGene00021369	WBGene00005634	WBGene00018283	WBGene00003891	WBGene00006824	WBGene00007126
WBGene00012867	WBGene00006970	WBGene00018056	WBGene00007750	WBGene00021027	WBGene00009306	WBGene00022203
WBGene00003086	WBGene00018145	WBGene00005423	WBGene00020794	WBGene00302974	WBGene00006789	WBGene00020494
WBGene00013304	WBGene00021581	WBGene00019179	WBGene00000294	WBGene00022388	WBGene00001488	WBGene00018938
WBGene00194649	WBGene00003955	WBGene00018539	WBGene00018310	WBGene00022155	WBGene00004237	WBGene00219451
WBGene00013315	WBGene00019531	WBGene00019470	WBGene00022278	WBGene00022161	WBGene00013969	WBGene00018589
WBGene00005101	WBGene00019530	WBGene00005623	WBGene00001773	WBGene00022143	WBGene00021986	WBGene00020767
WBGene00013632	WBGene00000611	WBGene00021555	WBGene00022112	WBGene00004014	WBGene00018783	WBGene00019735
WBGene00013658	WBGene00000123	WBGene00019235	WBGene00017909	WBGene00019461	WBGene00019343	WBGene00015293
WBGene00013418	WBGene00000610	WBGene00017262	WBGene00003516	WBGene00000625	WBGene00017255	WBGene00006408
WBGene00013100	WBGene00017482	WBGene00017772	WBGene00016565	WBGene00021039	WBGene00022712	WBGene00006588
WBGene00004403	WBGene00020977	WBGene00000980	WBGene00022634	WBGene00021035	WBGene00019511	WBGene00006587
WBGene00013805	WBGene00022680	WBGene00021068	WBGene00007911	WBGene00008878	WBGene00021296	WBGene00022315
WBGene00007820	WBGene00000685	WBGene00018488	WBGene00206530	WBGene00013932	WBGene00017179	WBGene00000754
WBGene00006419	WBGene00020679	WBGene00044545	WBGene00004509	WBGene00008293	WBGene00021117	WBGene00003514
WBGene00015258	WBGene00006053	WBGene00022845	WBGene00010168	WBGene00010769	WBGene00021171	WBGene00008622
WBGene00015255	WBGene00004374	WBGene00019655	WBGene00012500	WBGene00009361	WBGene00013266	WBGene00002280
WBGene00005258	WBGene00020435	WBGene00020528	WBGene00020205	WBGene00012036	WBGene00012288	WBGene00003370
WBGene00003696	WBGene00004804	WBGene00006801	WBGene00019700	WBGene00013403	WBGene00012332	WBGene00020732
WBGene00001480	WBGene00019153	WBGene00005925	WBGene00018442	WBGene00014102	WBGene00000662	WBGene00022275
WBGene00235315	WBGene00000256	WBGene00017316	WBGene00269388	WBGene00013672	WBGene00013221	WBGene00016906
WBGene00019977	WBGene00006052	WBGene00015464	WBGene00269389	WBGene00017208	WBGene00021043	WBGene00020090
WBGene00016513	WBGene00000551	WBGene00005108	WBGene00015827	WBGene00019335	WBGene00017937	WBGene00021028
WBGene00021602	WBGene00000603	WBGene00016505	WBGene00022690	WBGene00001546	WBGene00020116	WBGene00022037
WBGene00021492	WBGene00004471	WBGene00044553	WBGene00206415	WBGene00020233	WBGene00020117	WBGene00020281
WBGene00000056	WBGene00006930	WBGene00018293	WBGene00017213	WBGene00004210	WBGene00021853	WBGene00022386
WBGene00206511	WBGene00019510	WBGene00018294	WBGene00016337	WBGene00019513	WBGene00019997	WBGene00022391
WBGene00016050	WBGene00016178	WBGene00015220	WBGene00019591	WBGene00015200	WBGene00021808	WBGene00044896
WBGene00016859	WBGene00000693	WBGene00003386	WBGene00016574	WBGene00020408	WBGene00013448	WBGene00003111
WBGene00020877	WBGene00011456	WBGene00016094	WBGene00005543	WBGene00001541	WBGene00012761	WBGene00006771
WBGene00020883	WBGene00000696	WBGene00000717	WBGene00015134	WBGene00020290		WBGene00044347
WBGene00015879	WBGene00000697	WBGene00044582	WBGene00019410	WBGene00015841		WBGene00021763
WBGene00015435	WBGene00000698	WBGene00017194	WBGene00016890	WBGene00021116		WBGene00021239
WBGene00020620	WBGene00011597	WBGene00000766	WBGene00011579	WBGene00021142		WBGene00021346
WBGene00021079	WBGene00011259	WBGene00008233	WBGene00001133	WBGene00011304		WBGene00021469
WBGene00021078	WBGene00007448	WBGene00006470	WBGene00022344	WBGene00010989		WBGene00077563
WBGene00021559	WBGene00009038	WBGene00009584	WBGene00021900	WBGene00011522		WBGene00021473
WBGene00019274	WBGene00003148	WBGene00005618	WBGene00015580	WBGene00012586		WBGene00017736
WBGene00003574	WBGene00004755	WBGene00007073	WBGene00000542	WBGene00012595		WBGene00016950
WBGene00019649	WBGene00010920	WBGene00012530	WBGene00044903	WBGene00013011		WBGene00004226
WBGene00000862	WBGene00000703	WBGene00011891	WBGene00006784	WBGene00006787		WBGene00000832
WBGene00015450	WBGene00009955	WBGene00011895	WBGene00219421	WBGene00013157		WBGene00021271
WBGene00004795	WBGene00007987	WBGene00013863		WBGene00018246		WBGene00023172
WBGene00017468	WBGene00003150	WBGene00009241		WBGene00004045		WBGene00018232
WBGene00004099	WBGene00000705	WBGene00009331		WBGene00020550		WBGene00022126
WBGene00000029	WBGene00000706	WBGene00000726		WBGene00019328		WBGene00045399
WBGene00000031	WBGene00000417	WBGene00010741		WBGene00015268		WBGene00016561
WBGene00021732	WBGene00004156	WBGene00001645		WBGene00002915		WBGene00000254
WBGene00015076	WBGene00013379	WBGene00008335		WBGene00020104		WBGene00006754
WBGene00015074	WBGene00007195	WBGene00008333		WBGene00000666		WBGene00009188
WBGene00015073	WBGene00000707	WBGene00000146		WBGene00004980		WBGene00003777
WBGene00018424	WBGene00013290	WBGene00010079		WBGene00010974		WBGene00013125
WBGene00015424	WBGene00012768	WBGene00004855		WBGene00003589		WBGene00013181
WBGene00015677	WBGene00012769	WBGene00003886		WBGene00008422		WBGene00010654
WBGene00020270	WBGene00010415	WBGene00008646		WBGene00013445		WBGene00008854
WBGene00004740	WBGene00000710	WBGene00014123		WBGene00194733		WBGene00001045
WBGene00018698	WBGene00012791	WBGene00014098				WBGene00007603
WBGene00017195	WBGene00013776	WBGene00011014				WBGene00012106
WBGene00010593	WBGene00219547	WBGene00008101				WBGene00012107
WBGene00011003	WBGene00013790	WBGene00011590				WBGene00004181
WBGene00008254	WBGene00006698	WBGene00011305				WBGene00012209
WBGene00001178	WBGene00002005	WBGene00011648				WBGene00012480
WBGene00044286	WBGene00003525	WBGene00045488				WBGene00009064
WBGene00001747	WBGene00021003	WBGene00010868				WBGene00011434
WBGene00004910	WBGene00019814	WBGene00010426				WBGene00012238
WBGene00003536	WBGene00020706	WBGene00010283				WBGene00013502
WBGene00011712	WBGene00021450	WBGene00008629				WBGene00009865
WBGene00008339	WBGene00019743	WBGene00219324				WBGene00002978
WBGene00009532	WBGene00003648	WBGene00013024				WBGene00020171
WBGene00011270	WBGene00005898	WBGene00008269				WBGene00000106
WBGene00011587	WBGene00005643	WBGene00011251				WBGene00020231
WBGene00011306	WBGene00020062	WBGene00008183				WBGene00044367
WBGene00007929	WBGene00019563	WBGene00004336				WBGene00003709
WBGene00044082	WBGene00021748	WBGene00010380				WBGene00022452
WBGene00013876	WBGene00019626	WBGene00004747				WBGene00022714
WBGene00009081	WBGene00022286	WBGene00006147				WBGene00016576
WBGene00001519	WBGene00020017	WBGene00006093				WBGene00020407
WBGene00011318	WBGene00021605	WBGene00012045				WBGene00017451
WBGene00005278	WBGene00021601	WBGene00009485				WBGene00017557
WBGene00009978	WBGene00044344	WBGene00009226				WBGene00000647
WBGene00006103	WBGene00020391	WBGene00007833				WBGene00017947
WBGene00006077	WBGene00021304	WBGene00194715				WBGene00015116
WBGene00011754	WBGene00021302	WBGene00013607				WBGene00001948
WBGene00012346	WBGene00018099	WBGene00009855				WBGene00011755
WBGene00005745	WBGene00018097	WBGene00005145				WBGene00002265
WBGene00012309	WBGene00016697	WBGene00013622				WBGene00012219
WBGene00012025	WBGene00021168	WBGene00013941				WBGene00012457
WBGene00012021	WBGene00018761	WBGene00013469				WBGene00016825
WBGene00005425	WBGene00018758	WBGene00005414				WBGene00012285
WBGene00004026	WBGene00302982	WBGene00008010				WBGene00012905
WBGene00013608	WBGene00003579	WBGene00006688				WBGene00012920
WBGene00009860	WBGene00021562	WBGene00008892				WBGene00009390
WBGene00005770	WBGene00005919	WBGene00011211				WBGene00010269
WBGene00003706	WBGene00004130	WBGene00013483				WBGene00002264
WBGene00005578	WBGene00002246	WBGene00008066				WBGene00012993
WBGene00011486	WBGene00020696	WBGene00005832				WBGene00008448
WBGene00013938	WBGene00020700	WBGene00012250				WBGene00013096
WBGene00013940	WBGene00003025	WBGene00044655				WBGene00012333
WBGene00013943	WBGene00021482	WBGene00013834				WBGene00010720
WBGene00009571	WBGene00000498	WBGene00005392				WBGene00012979
WBGene00005321	WBGene00019970	WBGene00009760				WBGene00000208
WBGene00011841	WBGene00020239	WBGene00012185				WBGene00013166
WBGene00050934	WBGene00021627	WBGene00000484				WBGene00007064
WBGene00013472	WBGene00006796	WBGene00015138				WBGene00016221
WBGene00013470	WBGene00000712	WBGene00017896				WBGene00006894
WBGene00044654	WBGene00022584	WBGene00003408				WBGene00001561
WBGene00044202	WBGene00000030	WBGene00017780				WBGene00016030
WBGene00009835	WBGene00015371	WBGene00019435				WBGene00015266
WBGene00012491	WBGene00000455	WBGene00019188				WBGene00022488
WBGene00012081	WBGene00019600	WBGene00016485				WBGene00021261
WBGene00008016	WBGene00018427	WBGene00022508				WBGene00021592
WBGene00008012	WBGene00000893	WBGene00001569				WBGene00021439
WBGene00194801	WBGene00000713	WBGene00044621				WBGene00016524
WBGene00010300	WBGene00017834	WBGene00018738				WBGene00022175
WBGene00007570	WBGene00020948	WBGene00001551				WBGene00004976
WBGene00008893	WBGene00000714	WBGene00018715				WBGene00015386
WBGene00007182	WBGene00020245	WBGene00018744				WBGene00010838
WBGene00194695	WBGene00003242	WBGene00015172				WBGene00010839
WBGene00005829	WBGene00018292	WBGene00000175				WBGene00010362
WBGene00013077	WBGene00000718	WBGene00006948				WBGene00012863
WBGene00006714	WBGene00016045	WBGene00015790				WBGene00004736
WBGene00012455	WBGene00011573	WBGene00001400				WBGene00012271
WBGene00013972	WBGene00006777	WBGene00006952				WBGene00012972
WBGene00008700	WBGene00000722	WBGene00020845				WBGene00012356
WBGene00012688	WBGene00000724	WBGene00015354				WBGene00012933
WBGene00012684	WBGene00000602	WBGene00020567				WBGene00012125
WBGene00003685	WBGene00000601	WBGene00022499				WBGene00001077
WBGene00003669	WBGene00009058	WBGene00021319				WBGene00004960
WBGene00012067	WBGene00011715	WBGene00020672				WBGene00013424
WBGene00219452	WBGene00004032	WBGene00018514
WBGene00009018	WBGene00000614	WBGene00006424
WBGene00044197	WBGene00003515	WBGene00015625
WBGene00008068	WBGene00005018	WBGene00000741
WBGene00007723	WBGene00001137	WBGene00020506
WBGene00012838	WBGene00000732	WBGene00016976
WBGene00012246	WBGene00000733	WBGene00006746
WBGene00012251	WBGene00044109	WBGene00015865
WBGene00013828	WBGene00044194	WBGene00020335
WBGene00005389	WBGene00003834	WBGene00018485
WBGene00013750	WBGene00011132	WBGene00019148
WBGene00013758	WBGene00009221	WBGene00017569
WBGene00009166	WBGene00011942	WBGene00011643
WBGene00001248	WBGene00011688	WBGene00003553
WBGene00001547	WBGene00009031	WBGene00011462
WBGene00022213	WBGene00008724	WBGene00010224
WBGene00004011	WBGene00012315	WBGene00007944
WBGene00022504	WBGene00045382	WBGene00007957
WBGene00016487	WBGene00009834	WBGene00219301
WBGene00044701	WBGene00007675	WBGene00000277
WBGene00020135	WBGene00012405	WBGene00012303
WBGene00019321	WBGene00010296	WBGene00004008
WBGene00016559	WBGene00006150	WBGene00008901
WBGene00001803	WBGene00005500	WBGene00004108
WBGene00018258	WBGene00007853	WBGene00007848
WBGene00003732	WBGene00005397	WBGene00012445
WBGene00000283	WBGene00013489	WBGene00001451
WBGene00015564	WBGene00013973	WBGene00013496
WBGene00016531	WBGene00009016	WBGene00007664
WBGene00001000	WBGene00009021	WBGene00010434
WBGene00019987	WBGene00012825	WBGene00001148
WBGene00006764	WBGene00003959	WBGene00007260
WBGene00006881	WBGene00006786	WBGene00007486
WBGene00008952	WBGene00007017	WBGene00007523
WBGene00000217	WBGene00000736	WBGene00017340
WBGene00010492	WBGene00015430	WBGene00000253
WBGene00007849	WBGene00004377	WBGene00020091
WBGene00007904	WBGene00017298	WBGene00022032
WBGene00007751	WBGene00019436	WBGene00044434
WBGene00009303	WBGene00006955	WBGene00020283
WBGene00010702	WBGene00000737	WBGene00021692
WBGene00004776	WBGene00001065	WBGene00021007
WBGene00015673	WBGene00003968	WBGene00003156
WBGene00304806	WBGene00020511	WBGene00001232
WBGene00016269	WBGene00044901	WBGene00003422
WBGene00015868	WBGene00004951	WBGene00000284
WBGene00018771	WBGene00000033	WBGene00017026
WBGene00016903	WBGene00018024	WBGene00044423
WBGene00016902	WBGene00003907	WBGene00001430
WBGene00235388	WBGene00000738	WBGene00003072
WBGene00002040	WBGene00018877	WBGene00003029
WBGene00022519	WBGene00000066	WBGene00016605
WBGene00236808	WBGene00022501	WBGene00021628
WBGene00021335	WBGene00006926	WBGene00006058
WBGene00004952	WBGene00044299	WBGene00016733
WBGene00022838	WBGene00001070	WBGene00001833
WBGene00022837	WBGene00002125	WBGene00016327
WBGene00000165	WBGene00000739	WBGene00015096
WBGene00021685	WBGene00000742	WBGene00004965
WBGene00001707	WBGene00000744	WBGene00185086
WBGene00019674	WBGene00003495	WBGene00018895
WBGene00004969	WBGene00020884	WBGene00020419
WBGene00018580	WBGene00000746	WBGene00002258
WBGene00018579	WBGene00015168	WBGene00016494
WBGene00001115	WBGene00044068	WBGene00020659
WBGene00006461	WBGene00004949	WBGene00006423
WBGene00017398	WBGene00006925	WBGene00011061
WBGene00017741	WBGene00017714	WBGene00011063
WBGene00022281	WBGene00001854	WBGene00007742
WBGene00000788	WBGene00017401	WBGene00000156
WBGene00022129	WBGene00011763	WBGene00003136
WBGene00022131	WBGene00013871	WBGene00008890
WBGene00022110	WBGene00000749	WBGene00008531
WBGene00004049	WBGene00000018	WBGene00219283
WBGene00022108	WBGene00011880	WBGene00009343
WBGene00003387	WBGene00001690	WBGene00009479
WBGene00021835	WBGene00001981	WBGene00007278
WBGene00020914	WBGene00000753	WBGene00002142
WBGene00021038	WBGene00010067	WBGene00014965
WBGene00017650	WBGene00044149	WBGene00010324
WBGene00016839	WBGene00003623	WBGene00009116
WBGene00000779	WBGene00010690	WBGene00016458
WBGene00006820	WBGene00000756	WBGene00044250
WBGene00019769	WBGene00006517	WBGene00008783
WBGene00006797	WBGene00001898	WBGene00009607
WBGene00006508	WBGene00006634	WBGene00010170
WBGene00006819	WBGene00007350	WBGene00011657
WBGene00001598	WBGene00008976	WBGene00008472
WBGene00007977	WBGene00001096	WBGene00010768
WBGene00010731	WBGene00000618	WBGene00003578
WBGene00016461	WBGene00011683	WBGene00012477
WBGene00077519	WBGene00007877	WBGene00004063
WBGene00013179	WBGene00007878	WBGene00012505
WBGene00000410	WBGene00004123	WBGene00008909
WBGene00000010	WBGene00007484	WBGene00014235
WBGene00007766	WBGene00020770	WBGene00014196
WBGene00010651	WBGene00000281	WBGene00009695
WBGene00000641	WBGene00045272	WBGene00010808
WBGene00010653	WBGene00015676	WBGene00011433
WBGene00009315	WBGene00006067	WBGene00014101
WBGene00008858	WBGene00003600	WBGene00001147
WBGene00002232	WBGene00018192	WBGene00009304
WBGene00206532	WBGene00022276	WBGene00020835
WBGene00009416	WBGene00021681	WBGene00021101
WBGene00012961	WBGene00000622	WBGene00021092
WBGene00010821	WBGene00003229	WBGene00021576
WBGene00009616	WBGene00002079	WBGene00019313
WBGene00011781	WBGene00020088	WBGene00018575
WBGene00008476	WBGene00006385	WBGene00018816
WBGene00003098	WBGene00022040	WBGene00015595
WBGene00006829	WBGene00001725	WBGene00194714
WBGene00012214	WBGene00022029	WBGene00019036
WBGene00077769	WBGene00022026	WBGene00019042
WBGene00009359	WBGene00021208	WBGene00018439
WBGene00009363	WBGene00000624	WBGene00018437
WBGene00011586	WBGene00021213	WBGene00305113
WBGene00012478	WBGene00022389	WBGene00015609
WBGene00009061	WBGene00021333	WBGene00016882
WBGene00006048	WBGene00021328	WBGene00022685
WBGene00007214	WBGene00001745	WBGene00016547
WBGene00007213	WBGene00004429	WBGene00019586
WBGene00012289	WBGene00271777	WBGene00271744
WBGene00013599	WBGene00021693	WBGene00235164
WBGene00012391	WBGene00022274	WBGene00017527
WBGene00012576	WBGene00022148	WBGene00018019
WBGene00012365	WBGene00022139	WBGene00020229
WBGene00045058	WBGene00022140	WBGene00019687
WBGene00007991	WBGene00021472	WBGene00022442
WBGene00004202	WBGene00021474	WBGene00305132
WBGene00014103	WBGene00021460	WBGene00021298
WBGene00008187	WBGene00017735	WBGene00017452
WBGene00010578	WBGene00006047	WBGene00305091
WBGene00013666	WBGene00021270	WBGene00019795
WBGene00013668	WBGene00017978	WBGene00019794
WBGene00013692	WBGene00004946	WBGene00020777
WBGene00020837	WBGene00022133	WBGene00018810
WBGene00018507	WBGene00021128	WBGene00016778
WBGene00017875	WBGene00021837	WBGene00017944
WBGene00017873	WBGene00004775	WBGene00018044
WBGene00016308	WBGene00021639	WBGene00018269
WBGene00019699	WBGene00000368	WBGene00016355
WBGene00006195	WBGene00004272	WBGene00019895
WBGene00019306	WBGene00004147	WBGene00019086
WBGene00003545	WBGene00021630	WBGene00017291
WBGene00018734	WBGene00020131	WBGene00000935
WBGene00023410	WBGene00021113	WBGene00002053
WBGene00021968	WBGene00019771	WBGene00018873
WBGene00018819	WBGene00017885	WBGene00001208
WBGene00018815	WBGene00003934	WBGene00016315
WBGene00019209	WBGene00001599	WBGene00019426
WBGene00019207	WBGene00020936	WBGene00003621
WBGene00019415	WBGene00003622	WBGene00019905
WBGene00020327	WBGene00002348	WBGene00015795
WBGene00020329	WBGene00011376	WBGene00001872
WBGene00015599	WBGene00009457	WBGene00016277
WBGene00019037	WBGene00002226	WBGene00018394
WBGene00019035	WBGene00010612	WBGene00017023
WBGene00018436	WBGene00013894	WBGene00022887
WBGene00018105	WBGene00009113	WBGene00006947
WBGene00018102	WBGene00015024	WBGene00006363
WBGene00020361	WBGene00018847	WBGene00003044
WBGene00015830	WBGene00013127	WBGene00008435
WBGene00018667	WBGene00004706	WBGene00010503
WBGene00020533	WBGene00013180	WBGene00003241
WBGene00044360	WBGene00010157	WBGene00004264
WBGene00016341	WBGene00007768	WBGene00000894
WBGene00016342	WBGene00009314	WBGene00009901
WBGene00019592	WBGene00000415	WBGene00195147
WBGene00019593	WBGene00013135	WBGene00008803
WBGene00305114	WBGene00013138	WBGene00011888
WBGene00017525	WBGene00305049	WBGene00007690
WBGene00004129	WBGene00010246	WBGene00001527
WBGene00018769	WBGene00009611	WBGene00011980
WBGene00005574	WBGene00011658	WBGene00007374
WBGene00005573	WBGene00012105	WBGene00008458
WBGene00017918	WBGene00001008	WBGene00014246
WBGene00017911	WBGene00010419	WBGene00014171
WBGene00022716	WBGene00012193	WBGene00000655
WBGene00015197	WBGene00003948	WBGene00002297
WBGene00015199	WBGene00010806	WBGene00009354
WBGene00005542	WBGene00012343	WBGene00011530
WBGene00002102	WBGene00012387	WBGene00007342
WBGene00017181	WBGene00012578	WBGene00007149
WBGene00018198	WBGene00009824	WBGene00010056
WBGene00021589	WBGene00006565	WBGene00008545
WBGene00015856	WBGene00007988	WBGene00012149
WBGene00021721	WBGene00008610	WBGene00009657
WBGene00017406	WBGene00005078	WBGene00012085
WBGene00044811	WBGene00000034	WBGene00000528
WBGene00271824	WBGene00016075	WBGene00013255
WBGene00006495	WBGene00019498	WBGene00013273
WBGene00017948	WBGene00018496	WBGene00012585
WBGene00206414	WBGene00235351	WBGene00012592
WBGene00021057	WBGene00000617	WBGene00045289
WBGene00018048	WBGene00004076	WBGene00012199
WBGene00004737	WBGene00020326	WBGene00000037
WBGene00022874	WBGene00020328	WBGene00011050
WBGene00004346	WBGene00022553	WBGene00011049
WBGene00020479	WBGene00003734	WBGene00010194
WBGene00001597	WBGene00018433	WBGene00018243
WBGene00004244	WBGene00006882	WBGene00018248
WBGene00018397	WBGene00017055	WBGene00003936
WBGene00023408	WBGene00022443	WBGene00018363
WBGene00011468	WBGene00020430	WBGene00000895
WBGene00007688	WBGene00016575	WBGene00017758
WBGene00004174	WBGene00005540	WBGene00022322
WBGene00007334	WBGene00005544	WBGene00021256
WBGene00006853	WBGene00005590	WBGene00010451
WBGene00008137	WBGene00015909	WBGene00009502
WBGene00003979	WBGene00018196	WBGene00007138
WBGene00010787	WBGene00021730	WBGene00303105
WBGene00012220	WBGene00015848	WBGene00000396
WBGene00012462	WBGene00303369	WBGene00022598
WBGene00006601	WBGene00019793	WBGene00002048
WBGene00013247	WBGene00017587	WBGene00016199
WBGene00016826	WBGene00017584	WBGene00015481
WBGene00008838	WBGene00016709	WBGene00015637
WBGene00011878	WBGene00020771	WBGene00017950
WBGene00012894	WBGene00022739	WBGene00000872
WBGene00012914	WBGene00001976	WBGene00020107
WBGene00008929	WBGene00003424	WBGene00018951
WBGene00012987	WBGene00000606	WBGene00003497
WBGene00012997	WBGene00000609	WBGene00022816
WBGene00010069	WBGene00000649	WBGene00045247
WBGene00013208	WBGene00001101	WBGene00015557
WBGene00011052	WBGene00003456	WBGene00019677
WBGene00008578	WBGene00003469	WBGene00000939
WBGene00044074	WBGene00004702	WBGene00016799
WBGene00010721	WBGene00019273	WBGene00016242
WBGene00012227	WBGene00015796	WBGene00003562
WBGene00010193	WBGene00016173	WBGene00015523
WBGene00013190	WBGene00011638	WBGene00022718
WBGene00021597	WBGene00009042	WBGene00003001
WBGene00016226	WBGene00000616	WBGene00007401
WBGene00020541	WBGene00000251	WBGene00003482
WBGene00020546	WBGene00000657	WBGene00013499
WBGene00002230	WBGene00004300	WBGene00009654
WBGene00020457	WBGene00000472	WBGene00001996
WBGene00019915	WBGene00000851	WBGene00012272
WBGene00022353	WBGene00006414	WBGene00000669
WBGene00005141	WBGene00005016	WBGene00006683
WBGene00005143	WBGene00004698	WBGene00013431
WBGene00019709	WBGene00010053	WBGene00044233
WBGene00021433	WBGene00013926	WBGene00006762
WBGene00021700	WBGene00012148	WBGene00010072
WBGene00021866	WBGene00008743	WBGene00013578
WBGene00021022	WBGene00002262	WBGene00011475
WBGene00017103	WBGene00000114	WBGene00011729
WBGene00021850	WBGene00012395	WBGene00007065
WBGene00003941	WBGene00012222	WBGene00016638
WBGene00022177	WBGene00003228	WBGene00000546
WBGene00022181	WBGene00000565	WBGene00016671
WBGene00019996	WBGene00004167	WBGene00022375
WBGene00019158	WBGene00013260	WBGene00022073
WBGene00019170	WBGene00002063
WBGene00020100	WBGene00004945
WBGene00020105	WBGene00008843
WBGene00021815	WBGene00044032
WBGene00007920	WBGene00012903
WBGene00001639	WBGene00004904
WBGene00008287	WBGene00012605
WBGene00006822	WBGene00000661
WBGene00000070	WBGene00004120
WBGene00021902	WBGene00009308
WBGene00022664	WBGene00003119
WBGene00019837	WBGene00013014
WBGene00004114	WBGene00000113
WBGene00000900	WBGene00010070
WBGene00000435	WBGene00010071
WBGene00017146	WBGene00013001
WBGene00017774	WBGene00303002
WBGene00018563	WBGene00013002
WBGene00022420	WBGene00013209
WBGene00220259	WBGene00001916
WBGene00015582	WBGene00008579
WBGene00015581	WBGene00013094
WBGene00003597	WBGene00001838
WBGene00008170	WBGene00012328
WBGene00009594	WBGene00012722
WBGene00000564	WBGene00012187
WBGene00011561	WBGene00012730
WBGene00006873	WBGene00010722
WBGene00006604	WBGene00010719
WBGene00013447	WBGene00012981
WBGene00004165	WBGene00012983
WBGene00007680	WBGene00012982
WBGene00007681	WBGene00011051
WBGene00013231	WBGene00010758
	WBGene00007479
	WBGene00013187
	WBGene00013192
	WBGene00013156
	WBGene00021596
	WBGene00019185
	WBGene00000663
	WBGene00016220
	WBGene00000081
	WBGene00021906
	WBGene00001412
	WBGene00015649
	WBGene00000903
	WBGene00004388
	WBGene00020455
	WBGene00003917
	WBGene00022348
	WBGene00019715
	WBGene00006513
	WBGene00000545
	WBGene00015242
	WBGene00004128
	WBGene00021436
	WBGene00000160
	WBGene00019167
	WBGene00009738
	WBGene00004765
	WBGene00009374
	WBGene00011114
	WBGene00000664
	WBGene00001076
	WBGene00019834
	WBGene00019831
	WBGene00015143
	WBGene00017778
	WBGene00015102
	WBGene00010475
	WBGene00014033
	WBGene00001734
	WBGene00001263
	WBGene00010573
	WBGene00011501
	WBGene00014801
	WBGene00000768
	WBGene00006536
	WBGene00010477
	WBGene00002219
	WBGene00010923
	WBGene00000668
	WBGene00006553
	WBGene00012124
	WBGene00012943
	WBGene00013438
	WBGene00013437
	WBGene00013435
	WBGene00013433
	WBGene00194864
	WBGene00000670
	WBGene00000671
	WBGene00007679
	WBGene00003234
	WBGene00013225
[hpl-2 hyp]	[hpl-2int]	[hpl-1int]	[hpl-2hyp][hpl-1int]	[hpl-2int][hpl-1int]	[hpl-2hyp][hpl-2int][hpl-1int]	[hpl-2hyp][hpl-2int]
WBGene00013228	WBGene00013232	WBGene00001702	WBGene00013741	WBGene00006571	WBGene00014179	WBGene00001946
WBGene00013563	WBGene00013242	WBGene00017483	WBGene00018141	WBGene00013044	WBGene00000676	WBGene00013735
WBGene00013732	WBGene00013243	WBGene00020976	WBGene00021579	WBGene00007209	WBGene00019368	WBGene00012552
WBGene00012544	WBGene00013544	WBGene00017923	WBGene00013881	WBGene00004075	WBGene00022298	WBGene00012721
WBGene00003406	WBGene00013545	WBGene00044482	WBGene00000022	WBGene00000674	WBGene00019785	WBGene00012806
WBGene00012803	WBGene00013549	WBGene00017116	WBGene00005687	WBGene00021011	WBGene00022090	WBGene00011735
WBGene00011399	WBGene00013036	WBGene00016291	WBGene00018055	WBGene00000677	WBGene00001548	WBGene00011736
WBGene00009730	WBGene00013912	WBGene00006780	WBGene00015886	WBGene00044462	WBGene00003884	WBGene00021939
WBGene00006612	WBGene00006804	WBGene00019055	WBGene00020612	WBGene00019540	WBGene00018547	WBGene00019067
WBGene00010662	WBGene00001457	WBGene00000820	WBGene00017796	WBGene00019875	WBGene00018065	WBGene00016636
WBGene00021395	WBGene00012711	WBGene00015937	WBGene00012117	WBGene00021871	WBGene00013642	WBGene00022427
WBGene00022048	WBGene00000672	WBGene00000687	WBGene00000453	WBGene00022679	WBGene00013651	WBGene00019536
WBGene00000213	WBGene00012717	WBGene00016398	WBGene00007154	WBGene00016953	WBGene00020707	WBGene00022101
WBGene00021948	WBGene00012720	WBGene00006504	WBGene00013884	WBGene00016845	WBGene00020954	WBGene00022100
WBGene00021938	WBGene00011474	WBGene00001187	WBGene00010385	WBGene00008720	WBGene00018824	WBGene00044488
WBGene00019070	WBGene00011478	WBGene00018901	WBGene00219308	WBGene00008033	WBGene00017174	WBGene00002243
WBGene00021931	WBGene00000067	WBGene00018900	WBGene00013492	WBGene00010712	WBGene00022015	WBGene00021869
WBGene00009518	WBGene00012306	WBGene00019901	WBGene00044331	WBGene00044689	WBGene00001855	WBGene00021893
WBGene00021519	WBGene00019821	WBGene00016698	WBGene00009854	WBGene00017173	WBGene00015366	WBGene00019545
WBGene00021513	WBGene00000675	WBGene00003625	WBGene00009859	WBGene00000478	WBGene00011536	WBGene00017924
WBGene00021505	WBGene00002187	WBGene00044508	WBGene00013623	WBGene00020241	WBGene00000782	WBGene00010350
WBGene00021509	WBGene00022046	WBGene00015573	WBGene00006249	WBGene00018552	WBGene00012020	WBGene00014139
WBGene00006738	WBGene00019774	WBGene00019503	WBGene00005521	WBGene00017986	WBGene00013628	WBGene00044258
WBGene00022302	WBGene00015993	WBGene00006914	WBGene00009906	WBGene00001714	WBGene00009296	WBGene00000708
WBGene00044467	WBGene00004824	WBGene00006220	WBGene00009195	WBGene00003994	WBGene00008984	WBGene00001604
WBGene00016023	WBGene00021945	WBGene00016182	WBGene00045381	WBGene00000715	WBGene00012404	WBGene00013999
WBGene00019783	WBGene00000679	WBGene00002222	WBGene00005461	WBGene00003849	WBGene00013953	WBGene00044512
WBGene00022097	WBGene00000680	WBGene00012118	WBGene00044212	WBGene00009724	WBGene00013944	WBGene00022435
WBGene00022377	WBGene00016427	WBGene00045183	WBGene00005328	WBGene00008396	WBGene00005393	WBGene00001564
WBGene00006705	WBGene00000681	WBGene00000594	WBGene00009297	WBGene00013878	WBGene00013481	WBGene00022285
WBGene00050885	WBGene00003794	WBGene00001653	WBGene00009836	WBGene00044193	WBGene00045364	WBGene00004139
WBGene00021877	WBGene00019537	WBGene00004228	WBGene00012492	WBGene00011948	WBGene00010107	WBGene00018115
WBGene00044489	WBGene00021507	WBGene00011182	WBGene00005349	WBGene00006375	WBGene00012836	WBGene00006589
WBGene00044490	WBGene00000682	WBGene00009035	WBGene00005330	WBGene00006585	WBGene00012253	WBGene00044521
WBGene00021881	WBGene00000683	WBGene00006406	WBGene00008017	WBGene00009196	WBGene00001691	WBGene00020962
WBGene00021892	WBGene00022300	WBGene00011727	WBGene00006692	WBGene00009572	WBGene00012186	WBGene00018060
WBGene00003889	WBGene00022134	WBGene00010918	WBGene00005493	WBGene00012304	WBGene00019146	WBGene00018061
WBGene00022608	WBGene00021430	WBGene00009547	WBGene00005507	WBGene00050893	WBGene00000185	WBGene00006164
WBGene00021370	WBGene00022078	WBGene00002827	WBGene00012570	WBGene00001080	WBGene00010331	WBGene00021080
WBGene00021586	WBGene00022382	WBGene00010666	WBGene00007565	WBGene00012574	WBGene00022517	WBGene00044541
WBGene00018645	WBGene00021870	WBGene00007732	WBGene00008899	WBGene00005419	WBGene00022390	WBGene00000244
WBGene00001033	WBGene00022069	WBGene00010435	WBGene00011212	WBGene00013950	WBGene00022385	WBGene00007082
WBGene00019721	WBGene00022070	WBGene00004424	WBGene00012575	WBGene00013954	WBGene00018786	WBGene00009299
WBGene00043067	WBGene00022064	WBGene00004333	WBGene00194680	WBGene00077655	WBGene00021690	WBGene00001397
WBGene00015049	WBGene00022060	WBGene00012191	WBGene00013971	WBGene00012452	WBGene00185098	WBGene00011254
WBGene00000692	WBGene00021087	WBGene00012090	WBGene00195058	WBGene00008070	WBGene00044435	WBGene00004003
WBGene00009075	WBGene00001999	WBGene00023520	WBGene00013586	WBGene00077688	WBGene00021471	WBGene00008441
WBGene00001476	WBGene00018330	WBGene00012159	WBGene00012689	WBGene00013824	WBGene00002179	WBGene00013343
WBGene00001328	WBGene00001692	WBGene00235300	WBGene00012818	WBGene00013830	WBGene00005517	WBGene00013487
WBGene00007446	WBGene00006769	WBGene00011371	WBGene00008946	WBGene00001700	WBGene00009753	WBGene00013583
WBGene00010351	WBGene00006383	WBGene00018010	WBGene00013832	WBGene00006321	WBGene00219319	WBGene00007583
WBGene00010352	WBGene00021381	WBGene00021451	WBGene00013771	WBGene00002983	WBGene00001131	WBGene00012808
WBGene00010354	WBGene00000481	WBGene00019452	WBGene00009762	WBGene00000083	WBGene00008853	WBGene00012809
WBGene00007778	WBGene00003129	WBGene00022756	WBGene00001237	WBGene00007934	WBGene00012102	WBGene00012815
WBGene00009889	WBGene00021358	WBGene00005896	WBGene00018607	WBGene00001251	WBGene00014201	WBGene00007177
WBGene00006766	WBGene00021365	WBGene00006268	WBGene00004335	WBGene00009787	WBGene00006616	WBGene00013765
WBGene00194915	WBGene00021371	WBGene00016686	WBGene00018227	WBGene00019574	WBGene00008188	WBGene00005147
WBGene00013375	WBGene00021369	WBGene00005634	WBGene00018283	WBGene00003891	WBGene00006824	WBGene00007126
WBGene00012867	WBGene00006970	WBGene00018056	WBGene00007750	WBGene00021027	WBGene00009306	WBGene00022203
WBGene00003086	WBGene00018145	WBGene00005423	WBGene00020794	WBGene00302974	WBGene00006789	WBGene00020494
WBGene00013304	WBGene00021581	WBGene00019179	WBGene00000294	WBGene00022388	WBGene00001488	WBGene00018938
WBGene00194649	WBGene00003955	WBGene00018539	WBGene00018310	WBGene00022155	WBGene00004237	WBGene00219451
WBGene00013315	WBGene00019531	WBGene00019470	WBGene00022278	WBGene00022161	WBGene00013969	WBGene00018589
WBGene00005101	WBGene00019530	WBGene00005623	WBGene00001773	WBGene00022143	WBGene00021986	WBGene00020767
WBGene00013632	WBGene00000611	WBGene00021555	WBGene00022112	WBGene00004014	WBGene00018783	WBGene00019735
WBGene00013658	WBGene00000123	WBGene00019235	WBGene00017909	WBGene00019461	WBGene00019343	WBGene00015293
WBGene00013418	WBGene00000610	WBGene00017262	WBGene00003516	WBGene00000625	WBGene00017255	WBGene00006408
WBGene00013100	WBGene00017482	WBGene00017772	WBGene00016565	WBGene00021039	WBGene00022712	WBGene00006588
WBGene00004403	WBGene00020977	WBGene00000980	WBGene00022634	WBGene00021035	WBGene00019511	WBGene00006587
WBGene00013805	WBGene00022680	WBGene00021068	WBGene00007911	WBGene00008878	WBGene00021296	WBGene00022315
WBGene00007820	WBGene00000685	WBGene00018488	WBGene00206530	WBGene00013932	WBGene00017179	WBGene00000754
WBGene00006419	WBGene00020679	WBGene00044545	WBGene00004509	WBGene00008293	WBGene00021117	WBGene00003514
WBGene00015258	WBGene00006053	WBGene00022845	WBGene00010168	WBGene00010769	WBGene00021171	WBGene00008622
WBGene00015255	WBGene00004374	WBGene00019655	WBGene00012500	WBGene00009361	WBGene00013266	WBGene00002280
WBGene00005258	WBGene00020435	WBGene00020528	WBGene00020205	WBGene00012036	WBGene00012288	WBGene00003370
WBGene00003696	WBGene00004804	WBGene00006801	WBGene00019700	WBGene00013403	WBGene00012332	WBGene00020732
WBGene00001480	WBGene00019153	WBGene00005925	WBGene00018442	WBGene00014102	WBGene00000662	WBGene00022275
WBGene00235315	WBGene00000256	WBGene00017316	WBGene00269388	WBGene00013672	WBGene00013221	WBGene00016906
WBGene00019977	WBGene00006052	WBGene00015464	WBGene00269389	WBGene00017208	WBGene00021043	WBGene00020090
WBGene00016513	WBGene00000551	WBGene00005108	WBGene00015827	WBGene00019335	WBGene00017937	WBGene00021028
WBGene00021602	WBGene00000603	WBGene00016505	WBGene00022690	WBGene00001546	WBGene00020116	WBGene00022037
WBGene00021492	WBGene00004471	WBGene00044553	WBGene00206415	WBGene00020233	WBGene00020117	WBGene00020281
WBGene00000056	WBGene00006930	WBGene00018293	WBGene00017213	WBGene00004210	WBGene00021853	WBGene00022386
WBGene00206511	WBGene00019510	WBGene00018294	WBGene00016337	WBGene00019513	WBGene00019997	WBGene00022391
WBGene00016050	WBGene00016178	WBGene00015220	WBGene00019591	WBGene00015200	WBGene00021808	WBGene00044896
WBGene00016859	WBGene00000693	WBGene00003386	WBGene00016574	WBGene00020408	WBGene00013448	WBGene00003111
WBGene00020877	WBGene00011456	WBGene00016094	WBGene00005543	WBGene00001541	WBGene00012761	WBGene00006771
WBGene00020883	WBGene00000696	WBGene00000717	WBGene00015134	WBGene00020290		WBGene00044347
WBGene00015879	WBGene00000697	WBGene00044582	WBGene00019410	WBGene00015841		WBGene00021763
WBGene00015435	WBGene00000698	WBGene00017194	WBGene00016890	WBGene00021116		WBGene00021239
WBGene00020620	WBGene00011597	WBGene00000766	WBGene00011579	WBGene00021142		WBGene00021346
WBGene00021079	WBGene00011259	WBGene00008233	WBGene00001133	WBGene00011304		WBGene00021469
WBGene00021078	WBGene00007448	WBGene00006470	WBGene00022344	WBGene00010989		WBGene00077563
WBGene00021559	WBGene00009038	WBGene00009584	WBGene00021900	WBGene00011522		WBGene00021473
WBGene00019274	WBGene00003148	WBGene00005618	WBGene00015580	WBGene00012586		WBGene00017736
WBGene00003574	WBGene00004755	WBGene00007073	WBGene00000542	WBGene00012595		WBGene00016950
WBGene00019649	WBGene00010920	WBGene00012530	WBGene00044903	WBGene00013011		WBGene00004226
WBGene00000862	WBGene00000703	WBGene00011891	WBGene00006784	WBGene00006787		WBGene00000832
WBGene00015450	WBGene00009955	WBGene00011895	WBGene00219421	WBGene00013157		WBGene00021271
WBGene00004795	WBGene00007987	WBGene00013863		WBGene00018246		WBGene00023172
WBGene00017468	WBGene00003150	WBGene00009241		WBGene00004045		WBGene00018232
WBGene00004099	WBGene00000705	WBGene00009331		WBGene00020550		WBGene00022126
WBGene00000029	WBGene00000706	WBGene00000726		WBGene00019328		WBGene00045399
WBGene00000031	WBGene00000417	WBGene00010741		WBGene00015268		WBGene00016561
WBGene00021732	WBGene00004156	WBGene00001645		WBGene00002915		WBGene00000254
WBGene00015076	WBGene00013379	WBGene00008335		WBGene00020104		WBGene00006754
WBGene00015074	WBGene00007195	WBGene00008333		WBGene00000666		WBGene00009188
WBGene00015073	WBGene00000707	WBGene00000146		WBGene00004980		WBGene00003777
WBGene00018424	WBGene00013290	WBGene00010079		WBGene00010974		WBGene00013125
WBGene00015424	WBGene00012768	WBGene00004855		WBGene00003589		WBGene00013181
WBGene00015677	WBGene00012769	WBGene00003886		WBGene00008422		WBGene00010654
WBGene00020270	WBGene00010415	WBGene00008646		WBGene00013445		WBGene00008854
WBGene00004740	WBGene00000710	WBGene00014123		WBGene00194733		WBGene00001045
WBGene00018698	WBGene00012791	WBGene00014098				WBGene00007603
WBGene00017195	WBGene00013776	WBGene00011014				WBGene00012106
WBGene00010593	WBGene00219547	WBGene00008101				WBGene00012107
WBGene00011003	WBGene00013790	WBGene00011590				WBGene00004181
WBGene00008254	WBGene00006698	WBGene00011305				WBGene00012209
WBGene00001178	WBGene00002005	WBGene00011648				WBGene00012480
WBGene00044286	WBGene00003525	WBGene00045488				WBGene00009064
WBGene00001747	WBGene00021003	WBGene00010868				WBGene00011434
WBGene00004910	WBGene00019814	WBGene00010426				WBGene00012238
WBGene00003536	WBGene00020706	WBGene00010283				WBGene00013502
WBGene00011712	WBGene00021450	WBGene00008629				WBGene00009865
WBGene00008339	WBGene00019743	WBGene00219324				WBGene00002978
WBGene00009532	WBGene00003648	WBGene00013024				WBGene00020171
WBGene00011270	WBGene00005898	WBGene00008269				WBGene00000106
WBGene00011587	WBGene00005643	WBGene00011251				WBGene00020231
WBGene00011306	WBGene00020062	WBGene00008183				WBGene00044367
WBGene00007929	WBGene00019563	WBGene00004336				WBGene00003709
WBGene00044082	WBGene00021748	WBGene00010380				WBGene00022452
WBGene00013876	WBGene00019626	WBGene00004747				WBGene00022714
WBGene00009081	WBGene00022286	WBGene00006147				WBGene00016576
WBGene00001519	WBGene00020017	WBGene00006093				WBGene00020407
WBGene00011318	WBGene00021605	WBGene00012045				WBGene00017451
WBGene00005278	WBGene00021601	WBGene00009485				WBGene00017557
WBGene00009978	WBGene00044344	WBGene00009226				WBGene00000647
WBGene00006103	WBGene00020391	WBGene00007833				WBGene00017947
WBGene00006077	WBGene00021304	WBGene00194715				WBGene00015116
WBGene00011754	WBGene00021302	WBGene00013607				WBGene00001948
WBGene00012346	WBGene00018099	WBGene00009855				WBGene00011755
WBGene00005745	WBGene00018097	WBGene00005145				WBGene00002265
WBGene00012309	WBGene00016697	WBGene00013622				WBGene00012219
WBGene00012025	WBGene00021168	WBGene00013941				WBGene00012457
WBGene00012021	WBGene00018761	WBGene00013469				WBGene00016825
WBGene00005425	WBGene00018758	WBGene00005414				WBGene00012285
WBGene00004026	WBGene00302982	WBGene00008010				WBGene00012905
WBGene00013608	WBGene00003579	WBGene00006688				WBGene00012920
WBGene00009860	WBGene00021562	WBGene00008892				WBGene00009390
WBGene00005770	WBGene00005919	WBGene00011211				WBGene00010269
WBGene00003706	WBGene00004130	WBGene00013483				WBGene00002264
WBGene00005578	WBGene00002246	WBGene00008066				WBGene00012993
WBGene00011486	WBGene00020696	WBGene00005832				WBGene00008448
WBGene00013938	WBGene00020700	WBGene00012250				WBGene00013096
WBGene00013940	WBGene00003025	WBGene00044655				WBGene00012333
WBGene00013943	WBGene00021482	WBGene00013834				WBGene00010720
WBGene00009571	WBGene00000498	WBGene00005392				WBGene00012979
WBGene00005321	WBGene00019970	WBGene00009760				WBGene00000208
WBGene00011841	WBGene00020239	WBGene00012185				WBGene00013166
WBGene00050934	WBGene00021627	WBGene00000484				WBGene00007064
WBGene00013472	WBGene00006796	WBGene00015138				WBGene00016221
WBGene00013470	WBGene00000712	WBGene00017896				WBGene00006894
WBGene00044654	WBGene00022584	WBGene00003408				WBGene00001561
WBGene00044202	WBGene00000030	WBGene00017780				WBGene00016030
WBGene00009835	WBGene00015371	WBGene00019435				WBGene00015266
WBGene00012491	WBGene00000455	WBGene00019188				WBGene00022488
WBGene00012081	WBGene00019600	WBGene00016485				WBGene00021261
WBGene00008016	WBGene00018427	WBGene00022508				WBGene00021592
WBGene00008012	WBGene00000893	WBGene00001569				WBGene00021439
WBGene00194801	WBGene00000713	WBGene00044621				WBGene00016524
WBGene00010300	WBGene00017834	WBGene00018738				WBGene00022175
WBGene00007570	WBGene00020948	WBGene00001551				WBGene00004976
WBGene00008893	WBGene00000714	WBGene00018715				WBGene00015386
WBGene00007182	WBGene00020245	WBGene00018744				WBGene00010838
WBGene00194695	WBGene00003242	WBGene00015172				WBGene00010839
WBGene00005829	WBGene00018292	WBGene00000175				WBGene00010362
WBGene00013077	WBGene00000718	WBGene00006948				WBGene00012863
WBGene00006714	WBGene00016045	WBGene00015790				WBGene00004736
WBGene00012455	WBGene00011573	WBGene00001400				WBGene00012271
WBGene00013972	WBGene00006777	WBGene00006952				WBGene00012972
WBGene00008700	WBGene00000722	WBGene00020845				WBGene00012356
WBGene00012688	WBGene00000724	WBGene00015354				WBGene00012933
WBGene00012684	WBGene00000602	WBGene00020567				WBGene00012125
WBGene00003685	WBGene00000601	WBGene00022499				WBGene00001077
WBGene00003669	WBGene00009058	WBGene00021319				WBGene00004960
WBGene00012067	WBGene00011715	WBGene00020672				WBGene00013424
WBGene00219452	WBGene00004032	WBGene00018514
WBGene00009018	WBGene00000614	WBGene00006424
WBGene00044197	WBGene00003515	WBGene00015625
WBGene00008068	WBGene00005018	WBGene00000741
WBGene00007723	WBGene00001137	WBGene00020506
WBGene00012838	WBGene00000732	WBGene00016976
WBGene00012246	WBGene00000733	WBGene00006746
WBGene00012251	WBGene00044109	WBGene00015865
WBGene00013828	WBGene00044194	WBGene00020335
WBGene00005389	WBGene00003834	WBGene00018485
WBGene00013750	WBGene00011132	WBGene00019148
WBGene00013758	WBGene00009221	WBGene00017569
WBGene00009166	WBGene00011942	WBGene00011643
WBGene00001248	WBGene00011688	WBGene00003553
WBGene00001547	WBGene00009031	WBGene00011462
WBGene00022213	WBGene00008724	WBGene00010224
WBGene00004011	WBGene00012315	WBGene00007944
WBGene00022504	WBGene00045382	WBGene00007957
WBGene00016487	WBGene00009834	WBGene00219301
WBGene00044701	WBGene00007675	WBGene00000277
WBGene00020135	WBGene00012405	WBGene00012303
WBGene00019321	WBGene00010296	WBGene00004008
WBGene00016559	WBGene00006150	WBGene00008901
WBGene00001803	WBGene00005500	WBGene00004108
WBGene00018258	WBGene00007853	WBGene00007848
WBGene00003732	WBGene00005397	WBGene00012445
WBGene00000283	WBGene00013489	WBGene00001451
WBGene00015564	WBGene00013973	WBGene00013496
WBGene00016531	WBGene00009016	WBGene00007664
WBGene00001000	WBGene00009021	WBGene00010434
WBGene00019987	WBGene00012825	WBGene00001148
WBGene00006764	WBGene00003959	WBGene00007260
WBGene00006881	WBGene00006786	WBGene00007486
WBGene00008952	WBGene00007017	WBGene00007523
WBGene00000217	WBGene00000736	WBGene00017340
WBGene00010492	WBGene00015430	WBGene00000253
WBGene00007849	WBGene00004377	WBGene00020091
WBGene00007904	WBGene00017298	WBGene00022032
WBGene00007751	WBGene00019436	WBGene00044434
WBGene00009303	WBGene00006955	WBGene00020283
WBGene00010702	WBGene00000737	WBGene00021692
WBGene00004776	WBGene00001065	WBGene00021007
WBGene00015673	WBGene00003968	WBGene00003156
WBGene00304806	WBGene00020511	WBGene00001232
WBGene00016269	WBGene00044901	WBGene00003422
WBGene00015868	WBGene00004951	WBGene00000284
WBGene00018771	WBGene00000033	WBGene00017026
WBGene00016903	WBGene00018024	WBGene00044423
WBGene00016902	WBGene00003907	WBGene00001430
WBGene00235388	WBGene00000738	WBGene00003072
WBGene00002040	WBGene00018877	WBGene00003029
WBGene00022519	WBGene00000066	WBGene00016605
WBGene00236808	WBGene00022501	WBGene00021628
WBGene00021335	WBGene00006926	WBGene00006058
WBGene00004952	WBGene00044299	WBGene00016733
WBGene00022838	WBGene00001070	WBGene00001833
WBGene00022837	WBGene00002125	WBGene00016327
WBGene00000165	WBGene00000739	WBGene00015096
WBGene00021685	WBGene00000742	WBGene00004965
WBGene00001707	WBGene00000744	WBGene00185086
WBGene00019674	WBGene00003495	WBGene00018895
WBGene00004969	WBGene00020884	WBGene00020419
WBGene00018580	WBGene00000746	WBGene00002258
WBGene00018579	WBGene00015168	WBGene00016494
WBGene00001115	WBGene00044068	WBGene00020659
WBGene00006461	WBGene00004949	WBGene00006423
WBGene00017398	WBGene00006925	WBGene00011061
WBGene00017741	WBGene00017714	WBGene00011063
WBGene00022281	WBGene00001854	WBGene00007742
WBGene00000788	WBGene00017401	WBGene00000156
WBGene00022129	WBGene00011763	WBGene00003136
WBGene00022131	WBGene00013871	WBGene00008890
WBGene00022110	WBGene00000749	WBGene00008531
WBGene00004049	WBGene00000018	WBGene00219283
WBGene00022108	WBGene00011880	WBGene00009343
WBGene00003387	WBGene00001690	WBGene00009479
WBGene00021835	WBGene00001981	WBGene00007278
WBGene00020914	WBGene00000753	WBGene00002142
WBGene00021038	WBGene00010067	WBGene00014965
WBGene00017650	WBGene00044149	WBGene00010324
WBGene00016839	WBGene00003623	WBGene00009116
WBGene00000779	WBGene00010690	WBGene00016458
WBGene00006820	WBGene00000756	WBGene00044250
WBGene00019769	WBGene00006517	WBGene00008783
WBGene00006797	WBGene00001898	WBGene00009607
WBGene00006508	WBGene00006634	WBGene00010170
WBGene00006819	WBGene00007350	WBGene00011657
WBGene00001598	WBGene00008976	WBGene00008472
WBGene00007977	WBGene00001096	WBGene00010768
WBGene00010731	WBGene00000618	WBGene00003578
WBGene00016461	WBGene00011683	WBGene00012477
WBGene00077519	WBGene00007877	WBGene00004063
WBGene00013179	WBGene00007878	WBGene00012505
WBGene00000410	WBGene00004123	WBGene00008909
WBGene00000010	WBGene00007484	WBGene00014235
WBGene00007766	WBGene00020770	WBGene00014196
WBGene00010651	WBGene00000281	WBGene00009695
WBGene00000641	WBGene00045272	WBGene00010808
WBGene00010653	WBGene00015676	WBGene00011433
WBGene00009315	WBGene00006067	WBGene00014101
WBGene00008858	WBGene00003600	WBGene00001147
WBGene00002232	WBGene00018192	WBGene00009304
WBGene00206532	WBGene00022276	WBGene00020835
WBGene00009416	WBGene00021681	WBGene00021101
WBGene00012961	WBGene00000622	WBGene00021092
WBGene00010821	WBGene00003229	WBGene00021576
WBGene00009616	WBGene00002079	WBGene00019313
WBGene00011781	WBGene00020088	WBGene00018575
WBGene00008476	WBGene00006385	WBGene00018816
WBGene00003098	WBGene00022040	WBGene00015595
WBGene00006829	WBGene00001725	WBGene00194714
WBGene00012214	WBGene00022029	WBGene00019036
WBGene00077769	WBGene00022026	WBGene00019042
WBGene00009359	WBGene00021208	WBGene00018439
WBGene00009363	WBGene00000624	WBGene00018437
WBGene00011586	WBGene00021213	WBGene00305113
WBGene00012478	WBGene00022389	WBGene00015609
WBGene00009061	WBGene00021333	WBGene00016882
WBGene00006048	WBGene00021328	WBGene00022685
WBGene00007214	WBGene00001745	WBGene00016547
WBGene00007213	WBGene00004429	WBGene00019586
WBGene00012289	WBGene00271777	WBGene00271744
WBGene00013599	WBGene00021693	WBGene00235164
WBGene00012391	WBGene00022274	WBGene00017527
WBGene00012576	WBGene00022148	WBGene00018019
WBGene00012365	WBGene00022139	WBGene00020229
WBGene00045058	WBGene00022140	WBGene00019687
WBGene00007991	WBGene00021472	WBGene00022442
WBGene00004202	WBGene00021474	WBGene00305132
WBGene00014103	WBGene00021460	WBGene00021298
WBGene00008187	WBGene00017735	WBGene00017452
WBGene00010578	WBGene00006047	WBGene00305091
WBGene00013666	WBGene00021270	WBGene00019795
WBGene00013668	WBGene00017978	WBGene00019794
WBGene00013692	WBGene00004946	WBGene00020777
WBGene00020837	WBGene00022133	WBGene00018810
WBGene00018507	WBGene00021128	WBGene00016778
WBGene00017875	WBGene00021837	WBGene00017944
WBGene00017873	WBGene00004775	WBGene00018044
WBGene00016308	WBGene00021639	WBGene00018269
WBGene00019699	WBGene00000368	WBGene00016355
WBGene00006195	WBGene00004272	WBGene00019895
WBGene00019306	WBGene00004147	WBGene00019086
WBGene00003545	WBGene00021630	WBGene00017291
WBGene00018734	WBGene00020131	WBGene00000935
WBGene00023410	WBGene00021113	WBGene00002053
WBGene00021968	WBGene00019771	WBGene00018873
WBGene00018819	WBGene00017885	WBGene00001208
WBGene00018815	WBGene00003934	WBGene00016315
WBGene00019209	WBGene00001599	WBGene00019426
WBGene00019207	WBGene00020936	WBGene00003621
WBGene00019415	WBGene00003622	WBGene00019905
WBGene00020327	WBGene00002348	WBGene00015795
WBGene00020329	WBGene00011376	WBGene00001872
WBGene00015599	WBGene00009457	WBGene00016277
WBGene00019037	WBGene00002226	WBGene00018394
WBGene00019035	WBGene00010612	WBGene00017023
WBGene00018436	WBGene00013894	WBGene00022887
WBGene00018105	WBGene00009113	WBGene00006947
WBGene00018102	WBGene00015024	WBGene00006363
WBGene00020361	WBGene00018847	WBGene00003044
WBGene00015830	WBGene00013127	WBGene00008435
WBGene00018667	WBGene00004706	WBGene00010503
WBGene00020533	WBGene00013180	WBGene00003241
WBGene00044360	WBGene00010157	WBGene00004264
WBGene00016341	WBGene00007768	WBGene00000894
WBGene00016342	WBGene00009314	WBGene00009901
WBGene00019592	WBGene00000415	WBGene00195147
WBGene00019593	WBGene00013135	WBGene00008803
WBGene00305114	WBGene00013138	WBGene00011888
WBGene00017525	WBGene00305049	WBGene00007690
WBGene00004129	WBGene00010246	WBGene00001527
WBGene00018769	WBGene00009611	WBGene00011980
WBGene00005574	WBGene00011658	WBGene00007374
WBGene00005573	WBGene00012105	WBGene00008458
WBGene00017918	WBGene00001008	WBGene00014246
WBGene00017911	WBGene00010419	WBGene00014171
WBGene00022716	WBGene00012193	WBGene00000655
WBGene00015197	WBGene00003948	WBGene00002297
WBGene00015199	WBGene00010806	WBGene00009354
WBGene00005542	WBGene00012343	WBGene00011530
WBGene00002102	WBGene00012387	WBGene00007342
WBGene00017181	WBGene00012578	WBGene00007149
WBGene00018198	WBGene00009824	WBGene00010056
WBGene00021589	WBGene00006565	WBGene00008545
WBGene00015856	WBGene00007988	WBGene00012149
WBGene00021721	WBGene00008610	WBGene00009657
WBGene00017406	WBGene00005078	WBGene00012085
WBGene00044811	WBGene00000034	WBGene00000528
WBGene00271824	WBGene00016075	WBGene00013255
WBGene00006495	WBGene00019498	WBGene00013273
WBGene00017948	WBGene00018496	WBGene00012585
WBGene00206414	WBGene00235351	WBGene00012592
WBGene00021057	WBGene00000617	WBGene00045289
WBGene00018048	WBGene00004076	WBGene00012199
WBGene00004737	WBGene00020326	WBGene00000037
WBGene00022874	WBGene00020328	WBGene00011050
WBGene00004346	WBGene00022553	WBGene00011049
WBGene00020479	WBGene00003734	WBGene00010194
WBGene00001597	WBGene00018433	WBGene00018243
WBGene00004244	WBGene00006882	WBGene00018248
WBGene00018397	WBGene00017055	WBGene00003936
[truncated: 32,368 more rows]

## Sheet: Common_genes_BLMP-1_HPL-1
[BLMP-1] and [HPL-1]
WBGene00000083
WBGene00000146
WBGene00000175
WBGene00000528
WBGene00000594
WBGene00000666
WBGene00000669
WBGene00000677
WBGene00000726
WBGene00000894
WBGene00000935
WBGene00001148
WBGene00001208
WBGene00001251
WBGene00001430
WBGene00001451
WBGene00002053
WBGene00003044
WBGene00003136
WBGene00003482
WBGene00003621
WBGene00003625
WBGene00003849
WBGene00003891
WBGene00004108
WBGene00004228
WBGene00004237
WBGene00004264
WBGene00005832
WBGene00006220
WBGene00006321
WBGene00006406
WBGene00006423
WBGene00006504
WBGene00006787
WBGene00006947
WBGene00007260
WBGene00007690
WBGene00007911
WBGene00007934
WBGene00007957
WBGene00008183
WBGene00008233
WBGene00008435
WBGene00008803
WBGene00008878
WBGene00008901
WBGene00009304
WBGene00009331
WBGene00009354
WBGene00010079
WBGene00010224
WBGene00010434
WBGene00010768
WBGene00010868
WBGene00011305
WBGene00011530
WBGene00011590
WBGene00011643
WBGene00012085
WBGene00012117
WBGene00012149
WBGene00012253
WBGene00013024
WBGene00013255
WBGene00013499
WBGene00013578
WBGene00013878
WBGene00014098
WBGene00014171
WBGene00014965
WBGene00015138
WBGene00015464
WBGene00015523
WBGene00015625
WBGene00015865
WBGene00015886
WBGene00016094
WBGene00016505
WBGene00016882
WBGene00016890
WBGene00016976
WBGene00017023
WBGene00017262
WBGene00017340
WBGene00018269
WBGene00018294
WBGene00018488
WBGene00018738
WBGene00018744
WBGene00018810
WBGene00018873
WBGene00019328
WBGene00019540
WBGene00019895
WBGene00020104
WBGene00020107
WBGene00020335
WBGene00020567
WBGene00020835
WBGene00021043
WBGene00021451
WBGene00021692
WBGene00021808
WBGene00021900
WBGene00044423
WBGene00044582
WBGene00219283

## Sheet: Common genes BMLP-1_tissues
[BLMP-1] and [HPL-1] and [INTESTINE]
WBGene00000083
WBGene00001451
WBGene00000528
WBGene00000894
WBGene00001208
WBGene00001251
WBGene00002053
WBGene00003044
WBGene00003136
WBGene00003621
WBGene00003625
WBGene00003891
WBGene00006406
WBGene00006504
WBGene00007260
WBGene00007934
WBGene00008183
WBGene00008233
WBGene00008878
WBGene00010079
WBGene00010868
WBGene00011590
WBGene00012117
WBGene00012149
WBGene00012253
WBGene00013024
WBGene00013878
WBGene00014098
WBGene00016890
WBGene00017023
WBGene00017340
WBGene00018269
WBGene00018294
WBGene00018488
WBGene00019895
WBGene00020107
WBGene00021692
WBGene00021900
